# Supplementary material for: Design, Synthesis and Biological Evaluation of Novel Triazole N-acylhydrazone Hybrids for Alzheimer’s Disease
Source: PubMed Central journal article supplement (PMC7397262; doi:10.3390/molecules25143165), 2020-07-10
Supplement: molecules-25-03165-s001.pdf [file molecules-25-03165-s001.pdf]

# Design, Synthesis and Biological Evaluation of Novel Triazole *N*-acylhydrazone Hybrids for Alzheimer's Disease

Matheus de Freitas Silva<sup>1\*</sup>, Ellen Tardelli Lima<sup>1</sup>, Letizia Proccoli<sup>2</sup>, Newton G. Castro<sup>3</sup>, Marcos Jorge R. Guimarães<sup>3</sup>, Fernanda M. R. da Silva<sup>3</sup>, Nathalia Fonseca Nadur<sup>4</sup>, Luciana Luiz de Azevedo<sup>4</sup>, Arthur Eugen Kümmerle<sup>4</sup>, Isabella Alvim Guedes<sup>5</sup>, Laurent Emmanuel Dardenne<sup>5</sup>, Vanessa Silva Gontijo<sup>1</sup>, Andrea Tarozzi<sup>2\*</sup>; and Claudio Viegas Jr<sup>1\*</sup>

1. Laboratory of Research in Medicinal Chemistry (PeQuiM), Federal University of Alfnas, Jovino Fernandes Sales Avenue, 2600, Alfnas/MG, 37130-000, Brazil; [defreitassilva.matheus@gmail.com](mailto:defreitassilva.matheus@gmail.com) (M.d.F.S.); [ellentflima17@gmail.com](mailto:ellentflima17@gmail.com) (E.T.L.); [vanessagontijo@yahoo.com.br](mailto:vanessagontijo@yahoo.com.br) (V.S.G.); [cvviegas@gmail.com](mailto:cvviegas@gmail.com) (C.V.J.)

2. Department for Life Quality Studies, Alma Mater Studiorum-University of Bologna, Corso d' Augusto 237, 47921 Rimini, Italy; [letizia.pruccoli2@unibo.it](mailto:letizia.pruccoli2@unibo.it) (L.P.); [andrea.tarozzi@unibo.it](mailto:andrea.tarozzi@unibo.it) (A.T.)

3. Laboratory of Molecular Pharmacology, Federal University of Rio de Janeiro, Avenida Carlos Chagas Filho, 373, Rio de Janeiro/RJ, 21941-590, Brazil; [ngcastro@icb.ufrj.br](mailto:ngcastro@icb.ufrj.br) (N.G.C.); [mj.jorge93@gmail.com](mailto:mj.jorge93@gmail.com) (M.J.R.G.); [dasilvafmr@gmail.com](mailto:dasilvafmr@gmail.com) (F.M.R.d.S.)

4. Laboratory of molecular Diversity and Medicinal Chemistry (LaDMol-QM), Federal Rural University of Rio de Janeiro – UFRRJ, BR-465, Km 7 Seropédica-Rio de Janeiro; [nathaliafn18@gmail.com](mailto:nathaliafn18@gmail.com) (N.F.N.); [lucianaluizazevedo@gmail.com](mailto:lucianaluizazevedo@gmail.com) (L.L.d.A.); [akummerle@yahoo.com.br](mailto:akummerle@yahoo.com.br) (A.E.K.)

5. Grupo de Modelagem Molecular em Sistemas Biológicos (GMMSB), National Laboratory for Scientific Computing - LNCC, Avenida Getúlio Vargas, 333, Petrópolis - RJ, Brazil; [isabella.alvim@gmail.com](mailto:isabella.alvim@gmail.com) (I.A.G.); [dardenne@lncc.br](mailto:dardenne@lncc.br) (L.E.D.)

\*Correspondence: [defreitassilva.matheus@gmail.com](mailto:defreitassilva.matheus@gmail.com)

Received: date; Accepted: date; Published: date

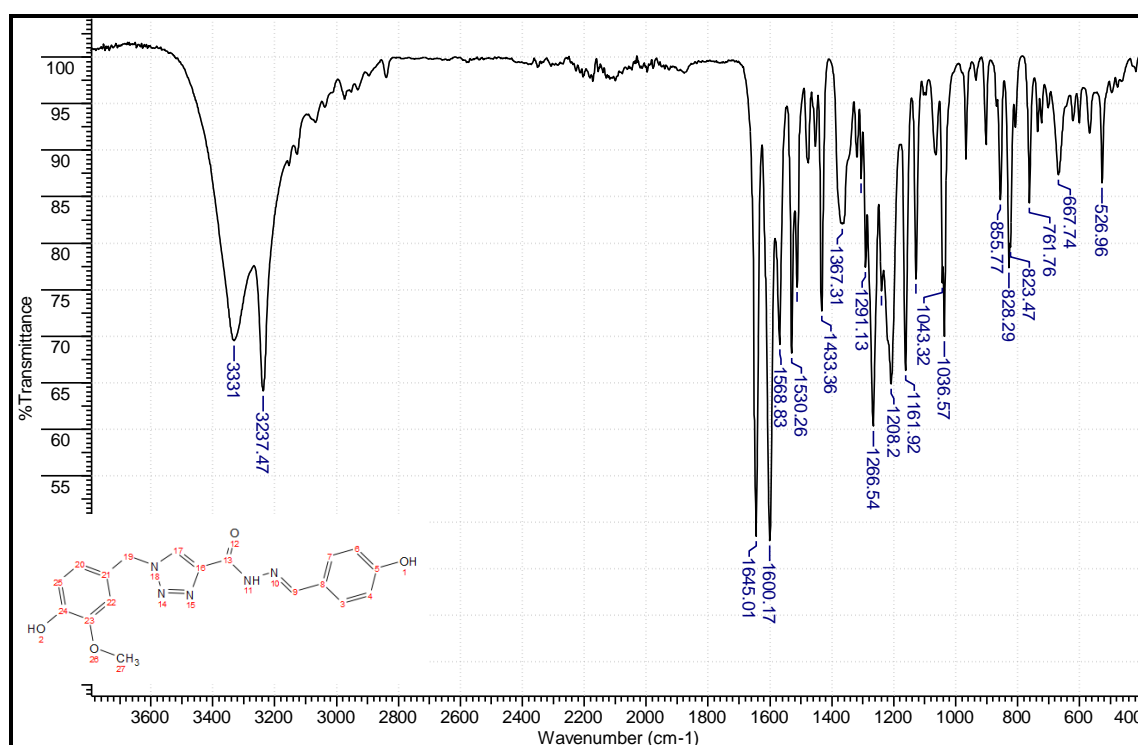

Figure S 1. Absorption spectra in the infrared region of (E)-1-(4-hydroxy-3-methoxybenzyl)-N'-(4-hydroxybenzylidene)-1H-1,2,3-triazole-4-carbohydrazone (3a).

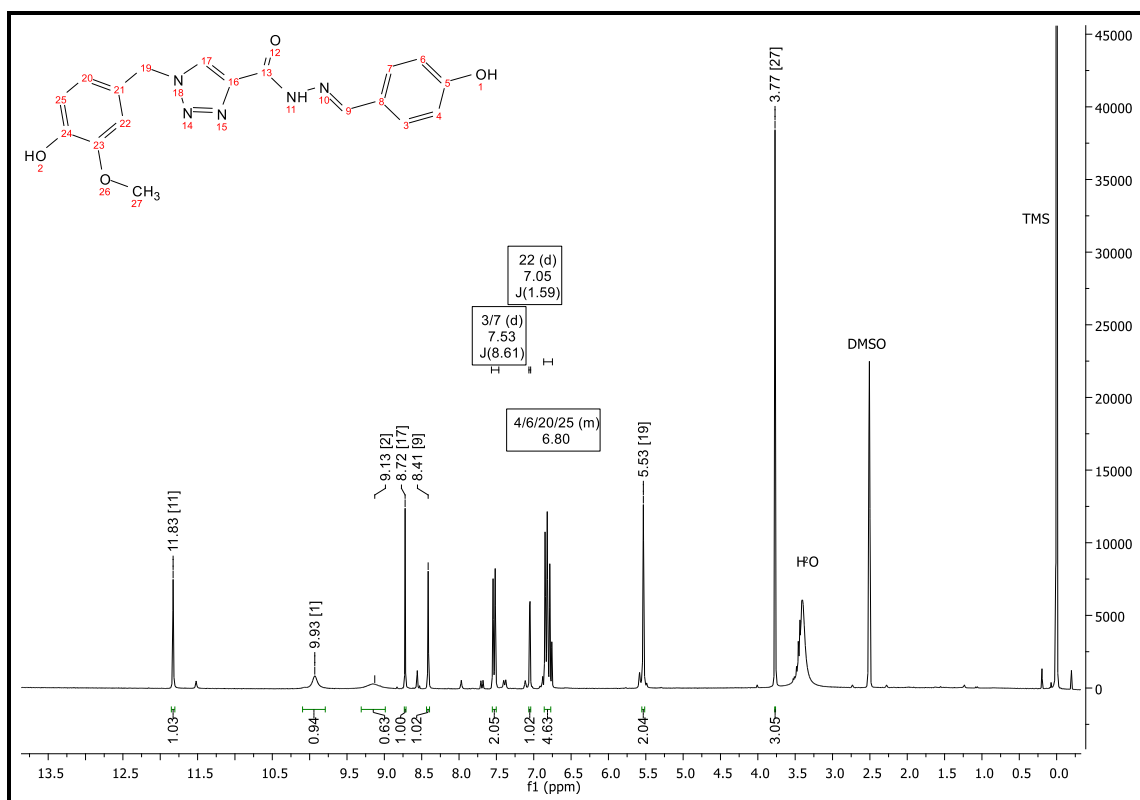

Figure S 2 <sup>1</sup>H NMR spectra of (E)-1-(4-hydroxy-3-methoxybenzyl)-N'-(4-hydroxybenzylidene)-1H-1,2,3-triazole-4-carbohydrazide (3a).

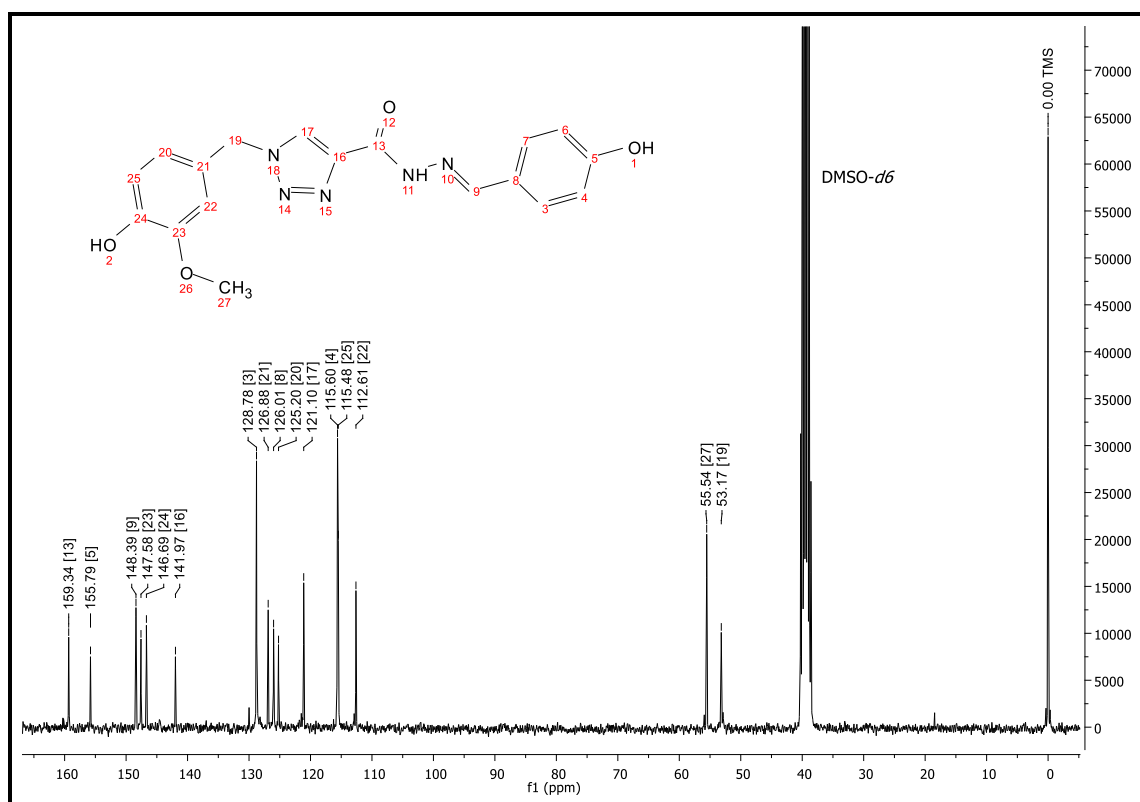

Figure S 3 <sup>13</sup>C NMR spectra of (E)-1-(4-hydroxy-3-methoxybenzyl)-N'-(4-hydroxybenzylidene)-1H-1,2,3-triazole-4-carbohydrazide (3a).

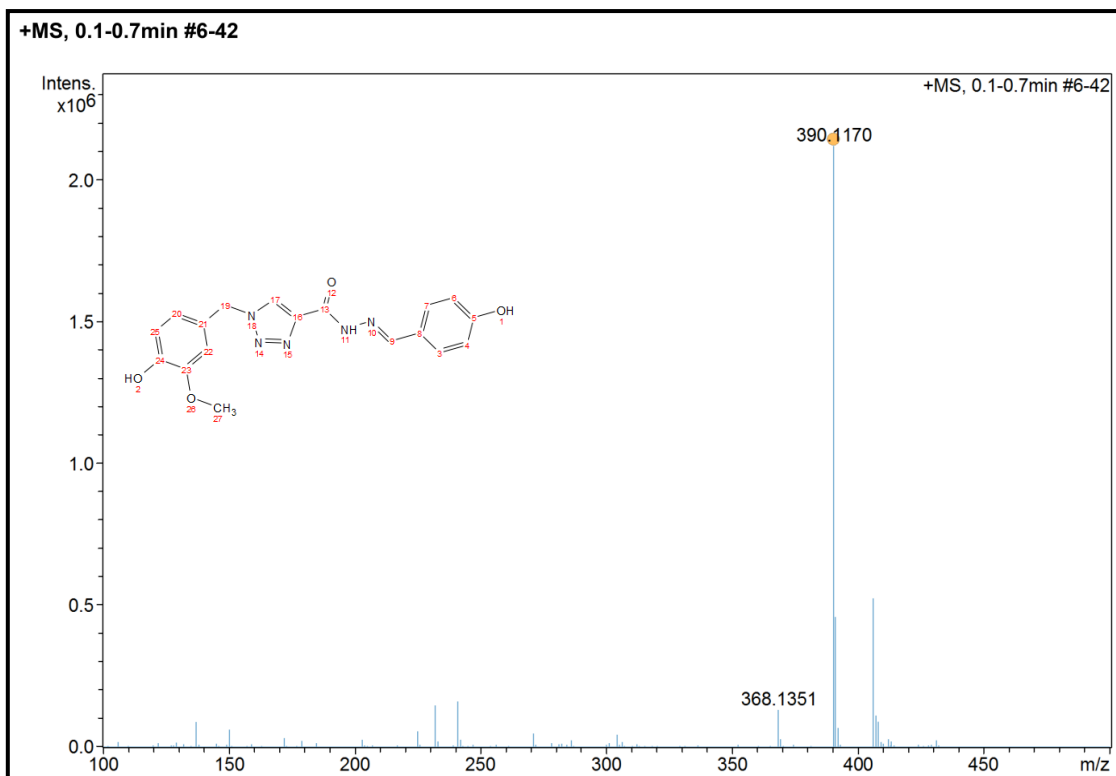

Figure S 4 . HR-MS spectra of (E)-1-(4-hydroxy-3-methoxybenzyl)-N'-(4-hydroxybenzylidene)-1H-1,2,3-triazole-4-carbohydrazide (3a).

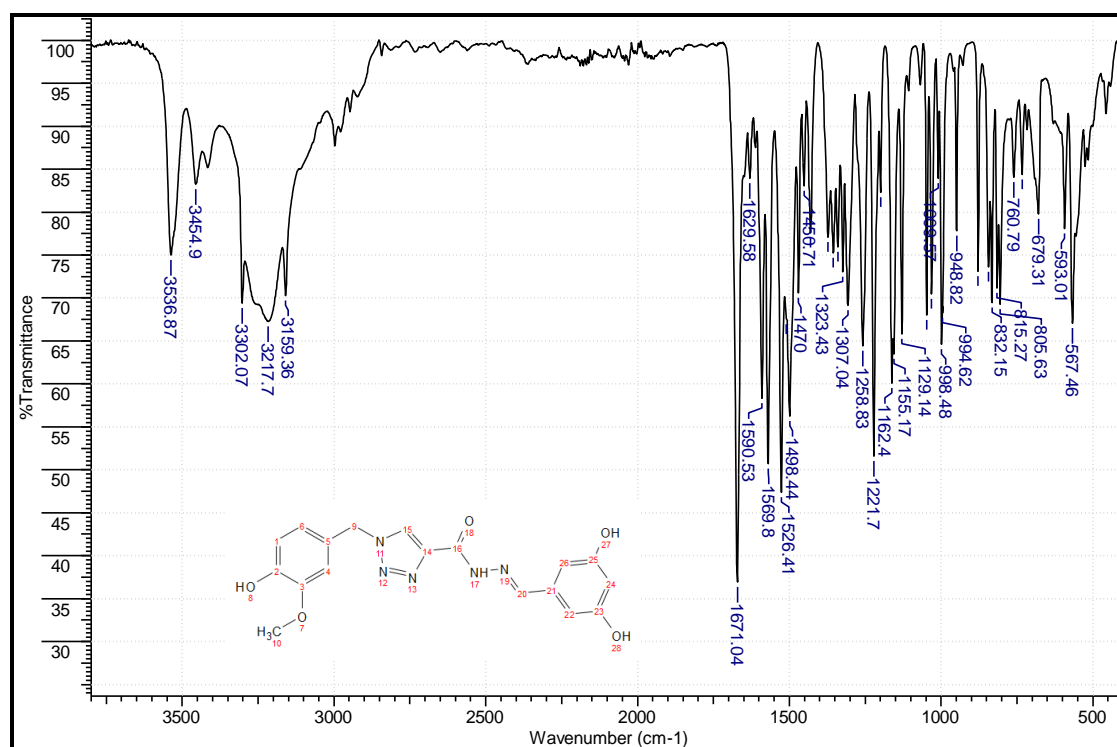

Figure S 5 Absorption spectra in the infrared region of (E)-N'-(3,5-dihydroxybenzylidene)-1-(4-hydroxy-3-methoxybenzyl)-1H-1,2,3-triazole-4-carbohydrazide (3b).

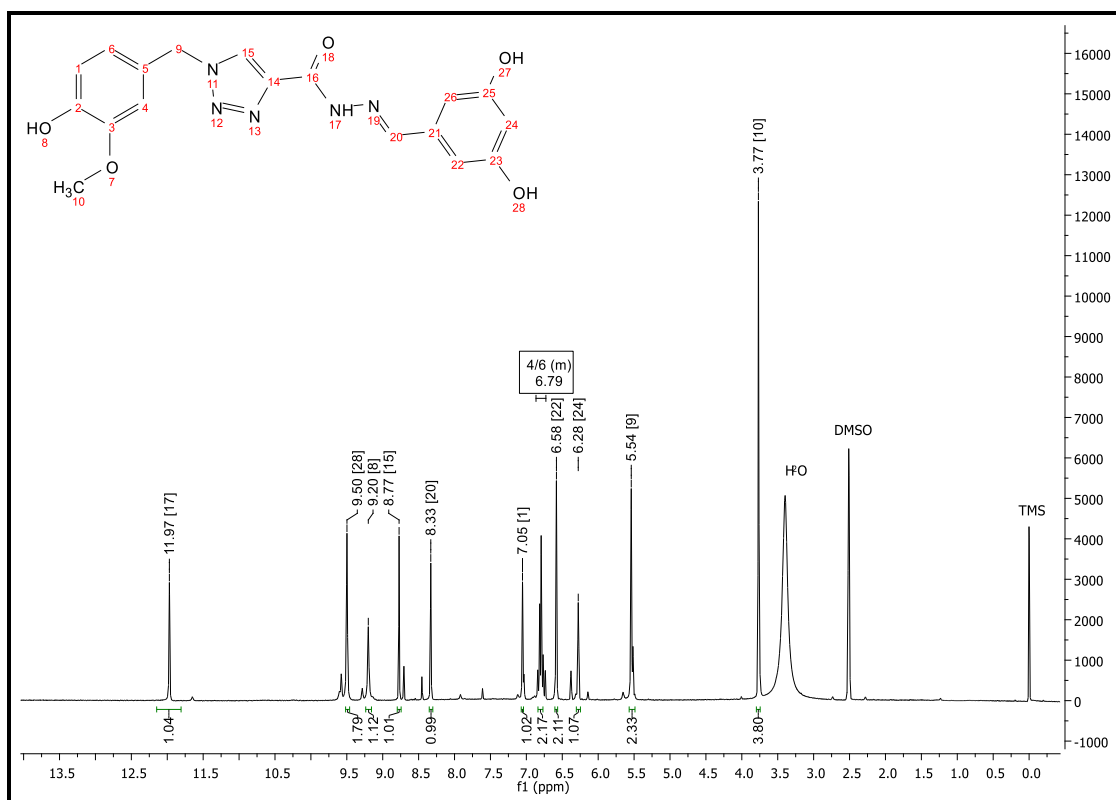

Figure S 6 <sup>1</sup>H NMR spectra of (E)-N'-(3,5-dihydroxybenzylidene)-1-(4-hydroxy-3-methoxybenzyl)-1H-1,2,3-triazole-4-carbohydrazide (3b).

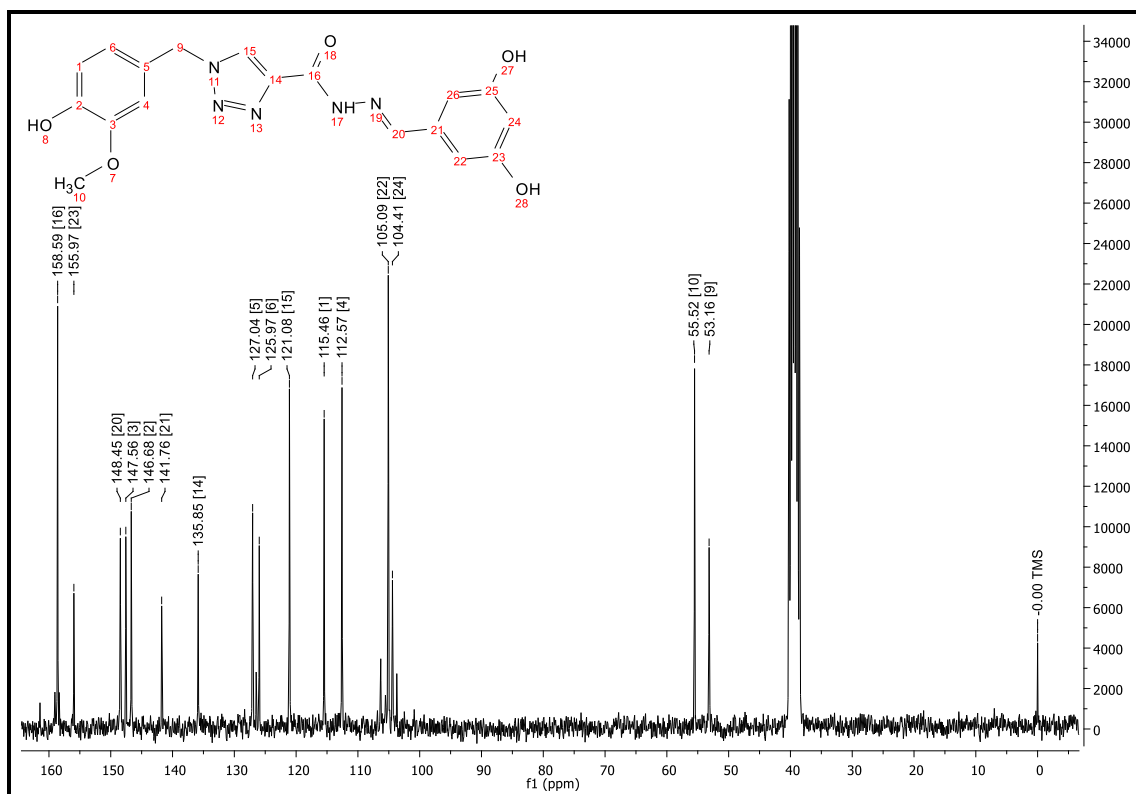

Figure S 7 <sup>13</sup>C NMR spectra of (E)-N'-(3,5-dihydroxybenzylidene)-1-(4-hydroxy-3-methoxybenzyl)-1H-1,2,3-triazole-4-carbohydrazide (3b).

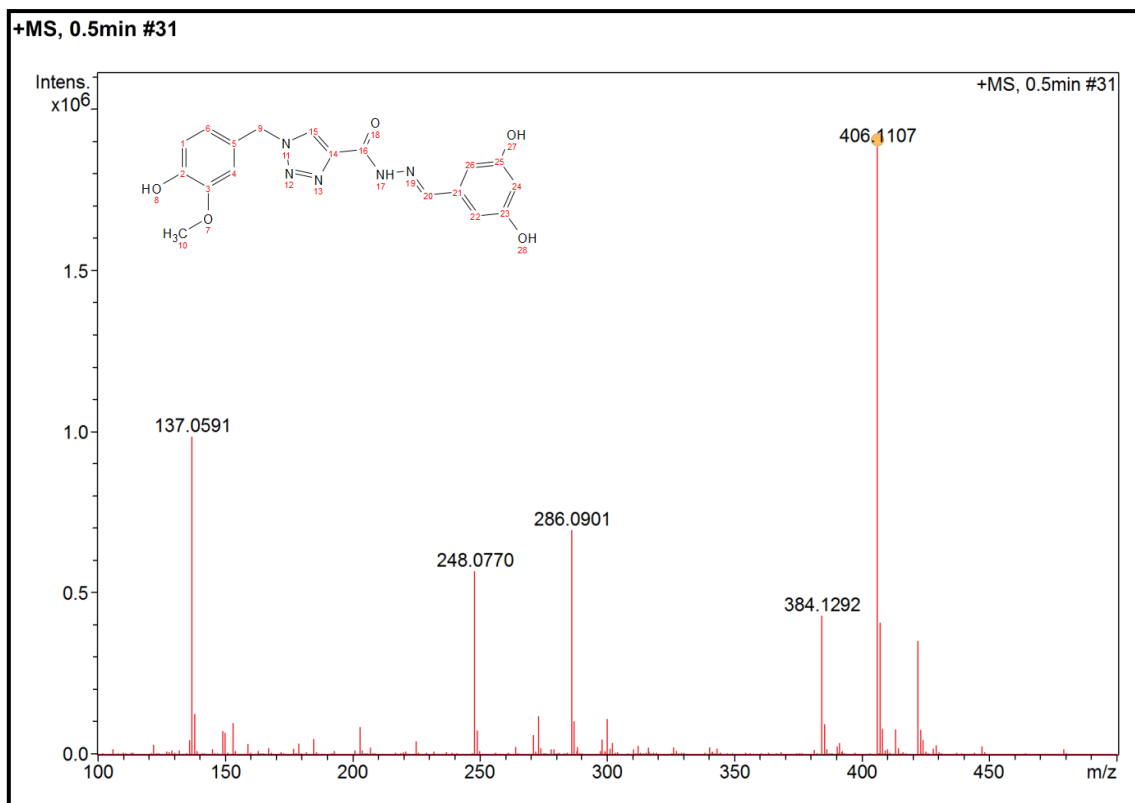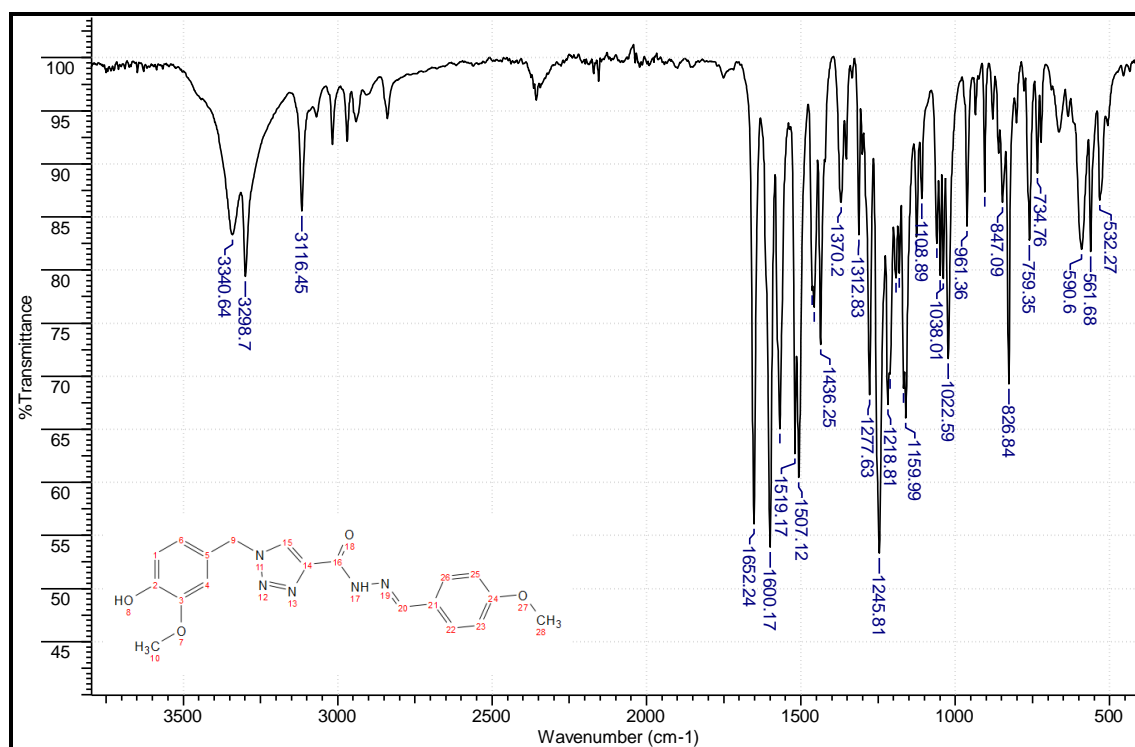

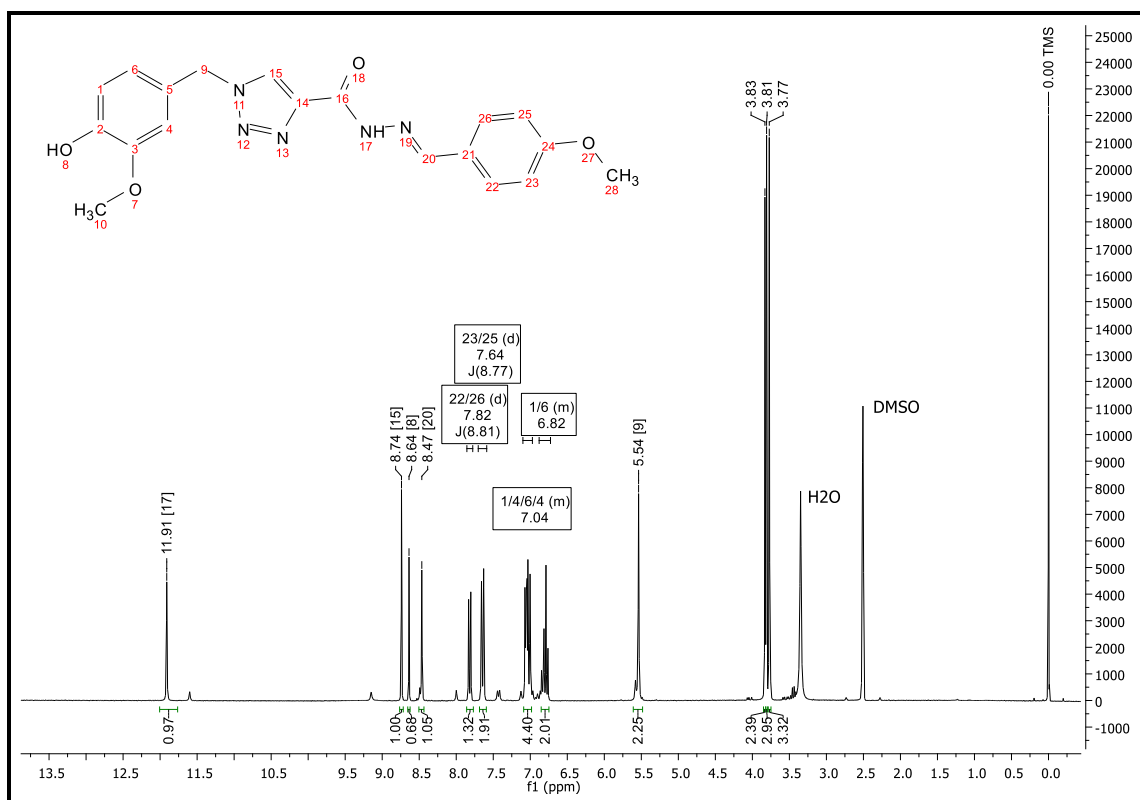

Figure S 1. <sup>1</sup>H NMR spectra of (E)-1-(4-hydroxy-3-methoxybenzyl)-N'-(4-methoxybenzylidene)-1H-1,2,3-triazole-4-carbohydrazide (**3c**).

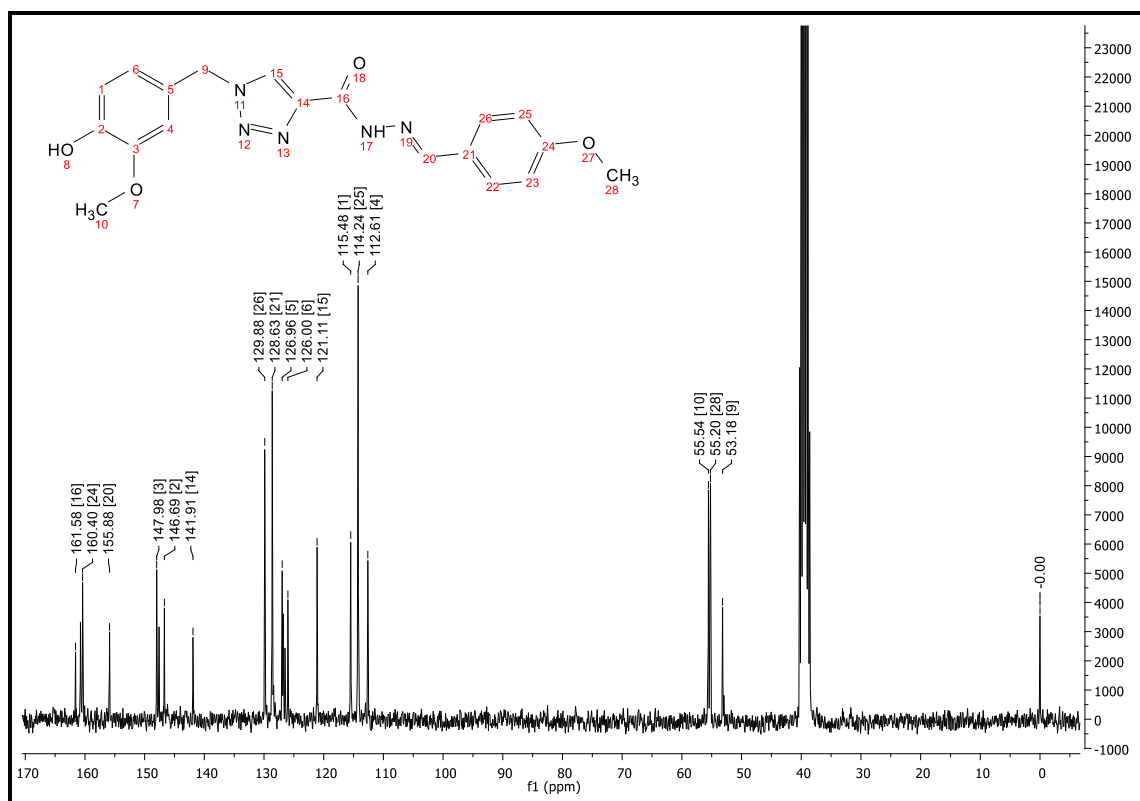

Figure S 2. <sup>13</sup>C NMR spectra of (E)-1-(4-hydroxy-3-methoxybenzyl)-N'-(4-methoxybenzylidene)-1H-1,2,3-triazole-4-carbohydrazide (**3c**).

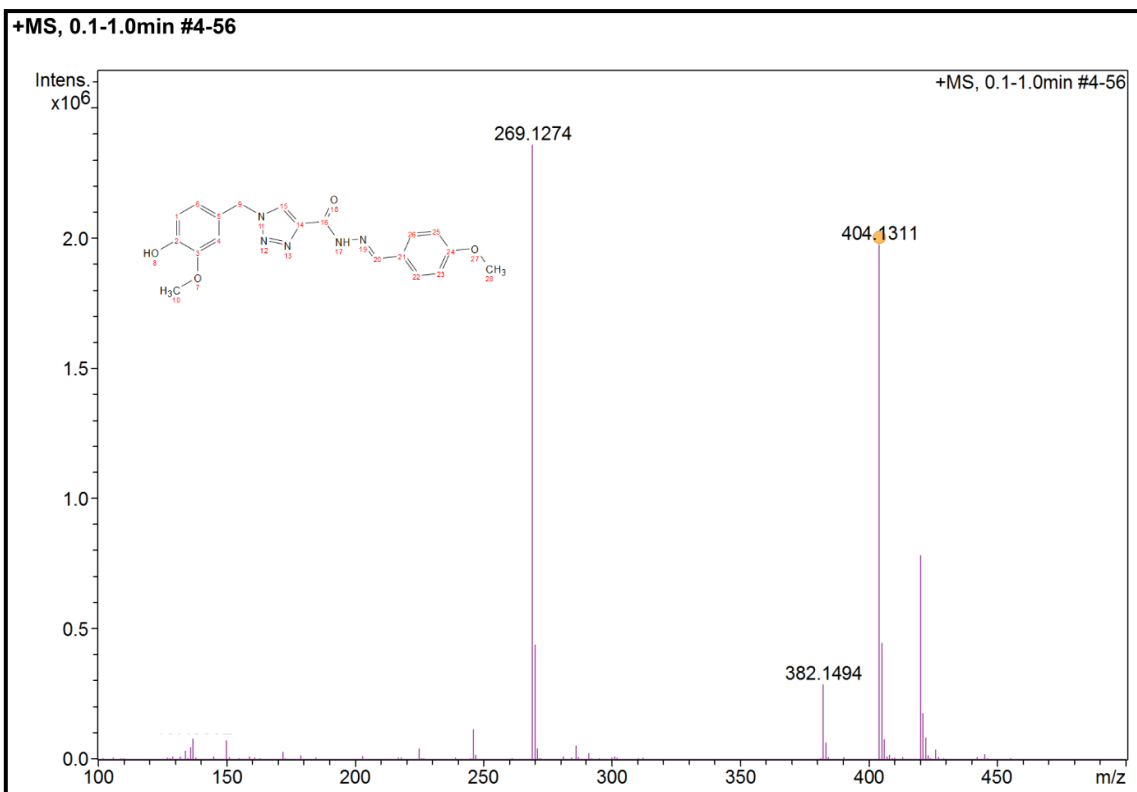

Figure S 3. HR-MS spectra of (E)-1-(4-hydroxy-3-methoxybenzyl)-N'-(4-methoxybenzylidene)-1H-1,2,3-triazole-4-carbohydrazide (**3c**).

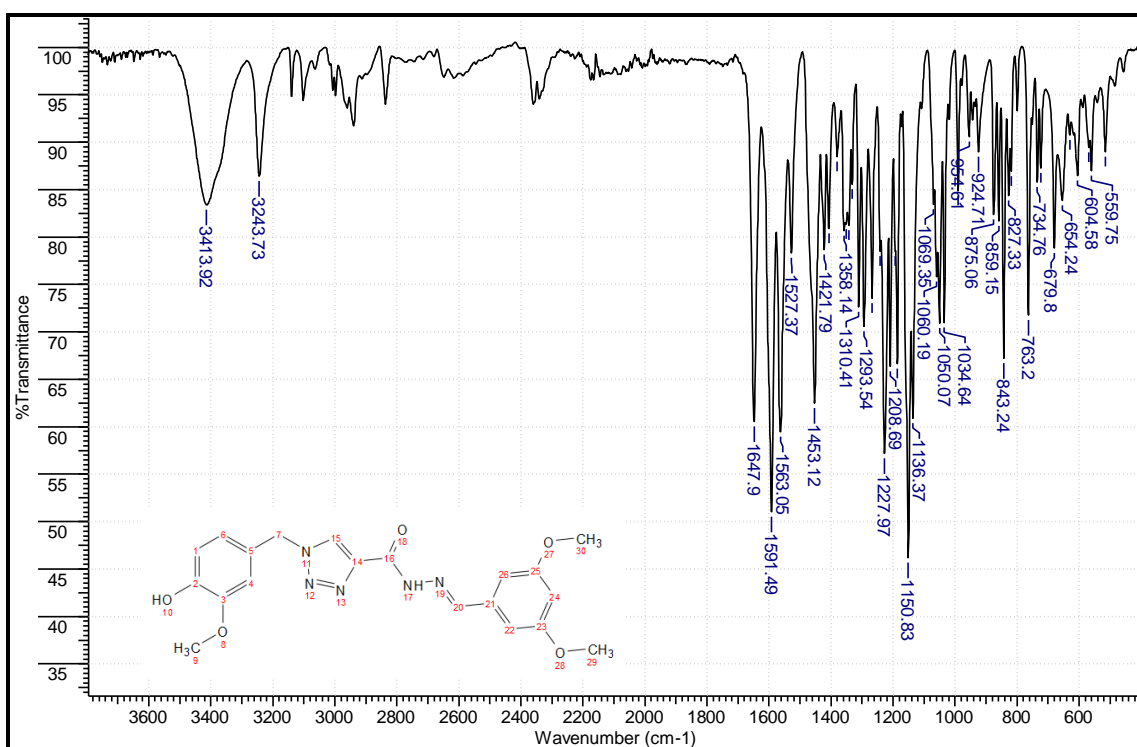

Figure S 4. Absorption spectra in the infrared region of (E)-N'-(3,5-dimethoxybenzylidene)-1-(4-hydroxy-3-methoxybenzyl)-1H-1,2,3-triazole-4-carbohydrazide (**3d**).

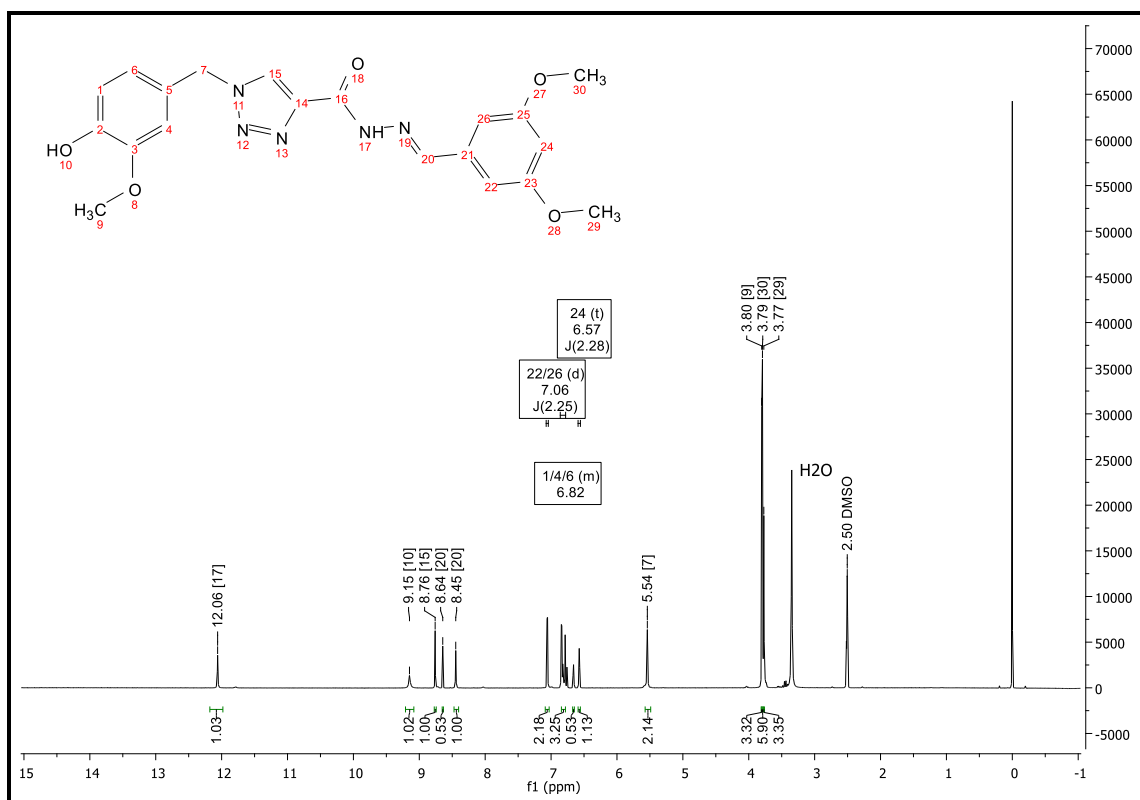

Figure S 5. <sup>1</sup>H NMR spectra of (E)-N'-(3,5-dimethoxybenzylidene)-1-(4-hydroxy-3-methoxybenzyl)-1H-1,2,3-triazole-4-carbohydrazide (**3d**).

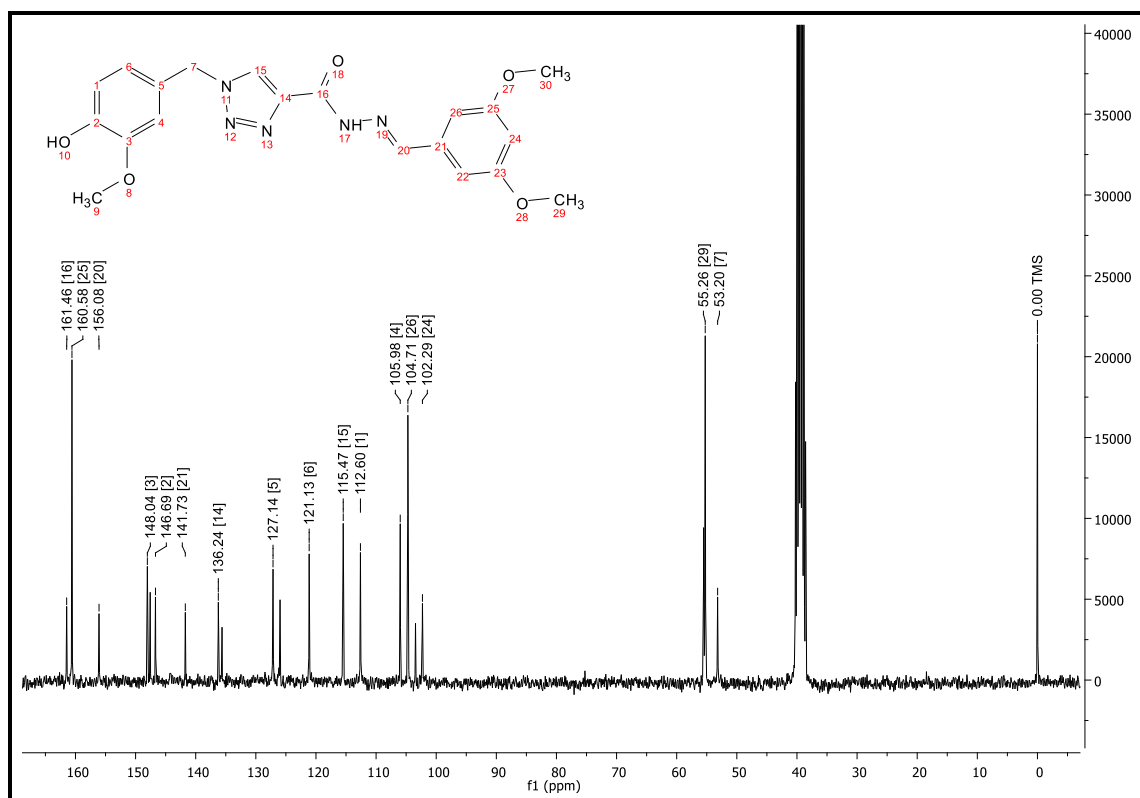

Figure S 6. <sup>13</sup>C NMR spectra of (E)-N'-(3,5-dimethoxybenzylidene)-1-(4-hydroxy-3-methoxybenzyl)-1H-1,2,3-triazole-4-carbohydrazide (**3d**).



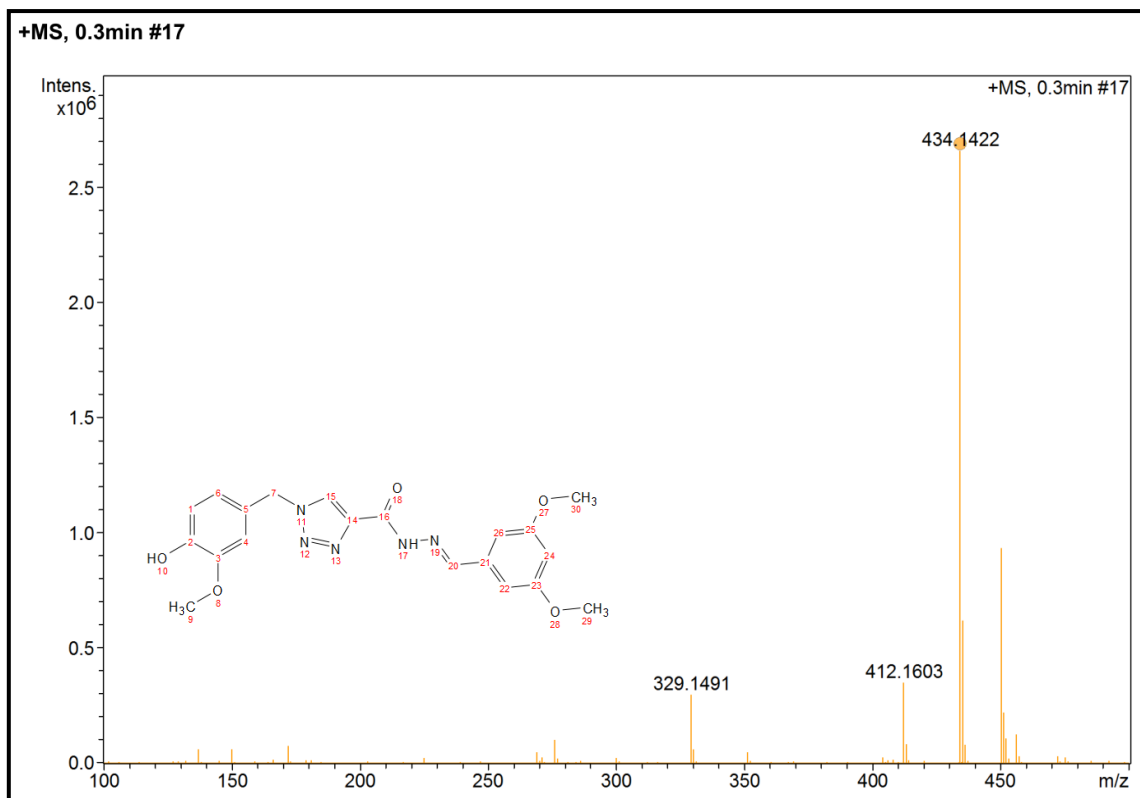

Figure S 7. HR-MS spectra of (E)-N'-(3,5-dimethoxybenzylidene)-1-(4-hydroxy-3-methoxybenzyl)-1H-1,2,3-triazole-4-carbohydrazide (**3d**).

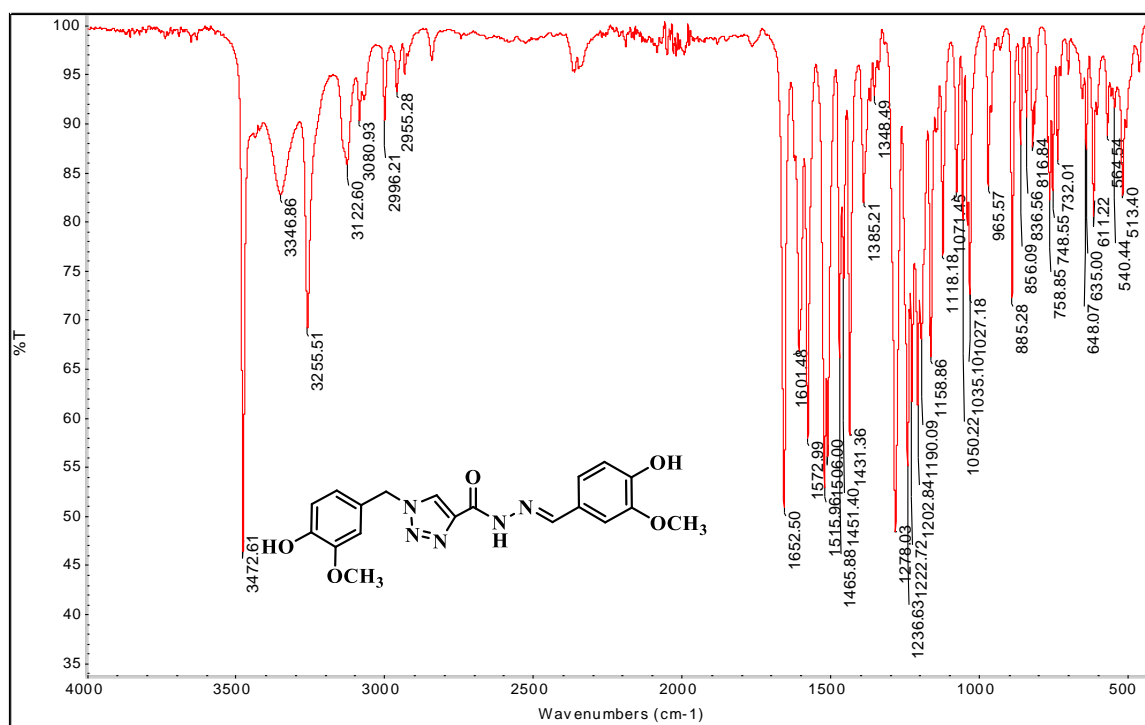

Figure S 8. Absorption spectra in the infrared region of (E)-1-(4-hydroxy-3-methoxybenzyl)-N'-(4-hydroxy-3-methoxybenzylidene)-1H-1,2,3-triazole-4-carbohydrazide (**3e**).

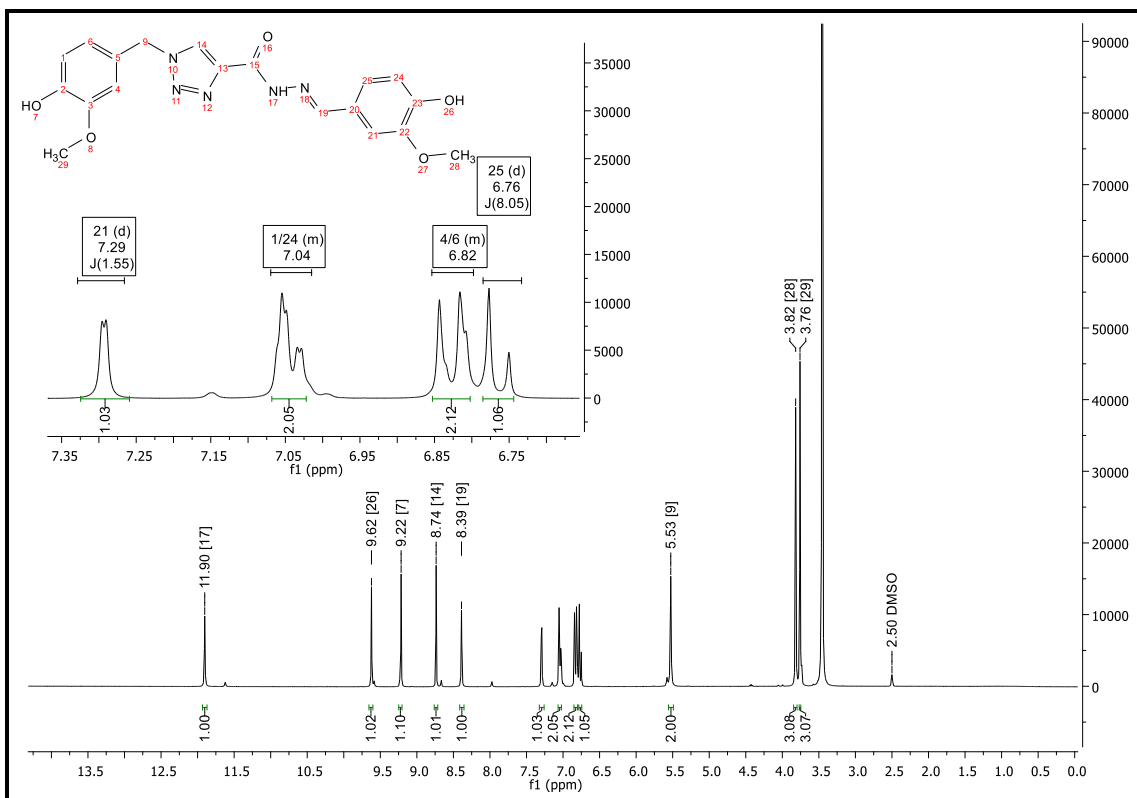

Figure S 9.  $^1\text{H}$  NMR spectra of (E)-1-(4-hydroxy-3-methoxybenzyl)-N'-(4-hydroxy-3-methoxybenzylidene)-1H-1,2,3-triazole-4-carbohydrazide (**3e**).

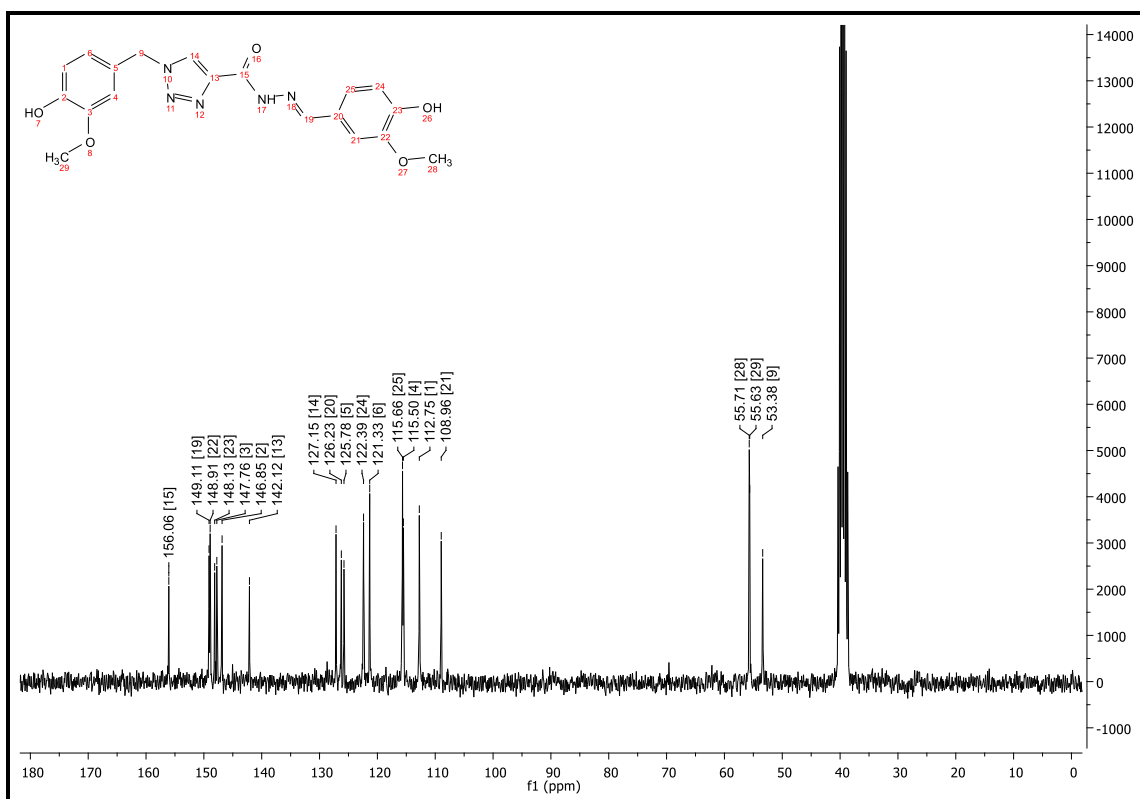

Figure S 10.  $^{13}\text{C}$  NMR spectra of (E)-1-(4-hydroxy-3-methoxybenzyl)-N'-(4-hydroxy-3-methoxybenzylidene)-1H-1,2,3-triazole-4-carbohydrazide (**3e**).



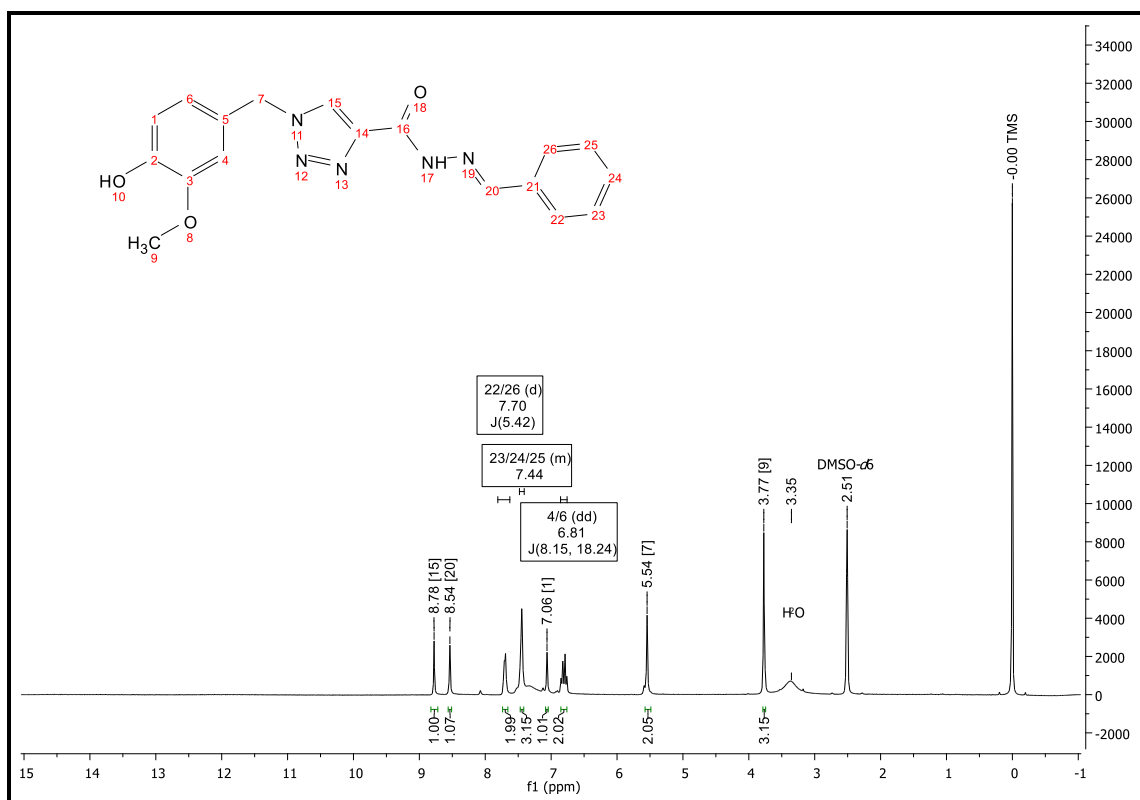

Figure S 13. <sup>1</sup>H NMR spectra of (E)-N'-benzylidene-1-(4-hydroxy-3-methoxybenzyl)-1H-1,2,3-triazole-4-carbohydrazide (3f).

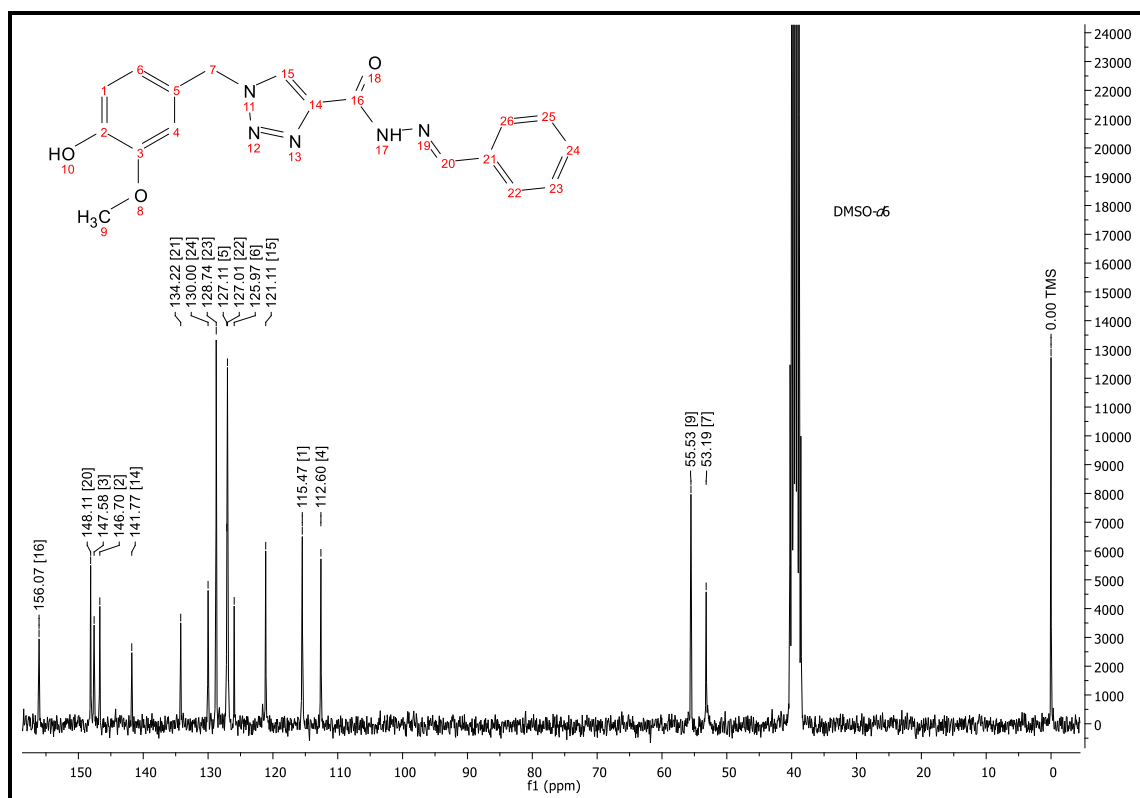

Figure S 14. <sup>13</sup>C NMR spectra of (E)-N'-benzylidene-1-(4-hydroxy-3-methoxybenzyl)-1H-1,2,3-triazole-4-carbohydrazide (3f).

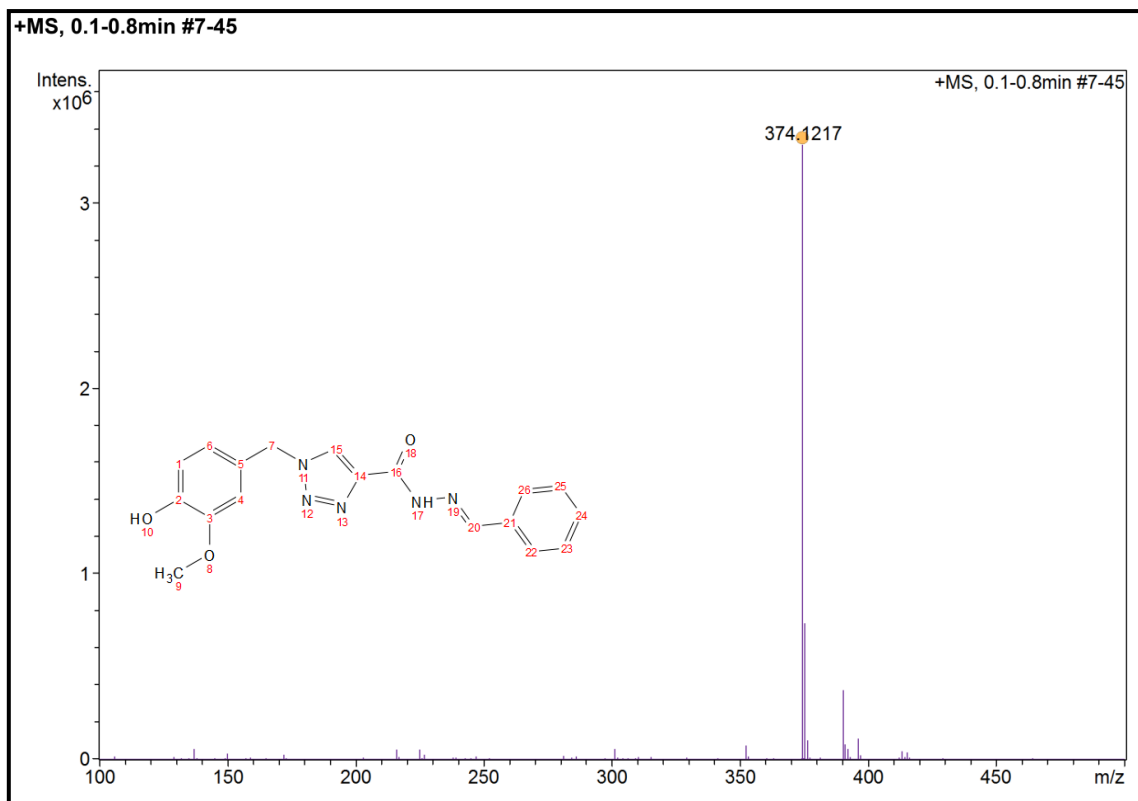

Figure S 15. HR-MS spectra of (E)-N'-benzylidene-1-(4-hydroxy-3-methoxybenzyl)-1H-1,2,3-triazole-4-carbohydrazide (**3f**).

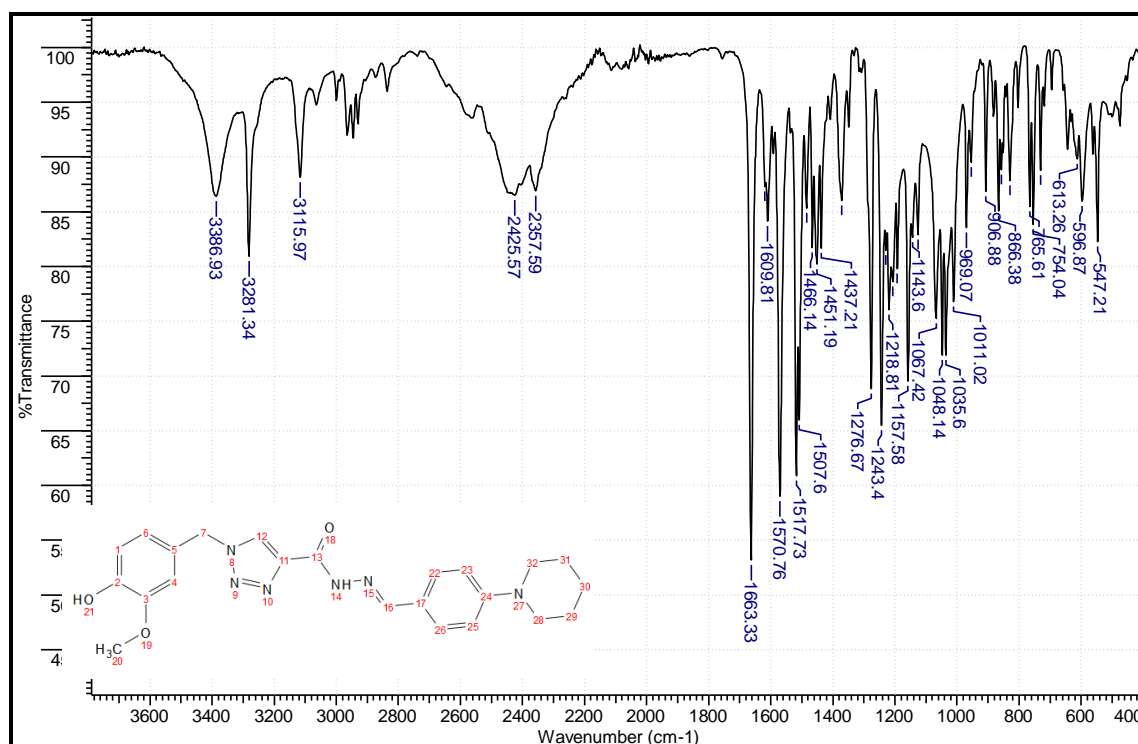

Figure S 16. Absorption spectra in the infrared region of (E)-1-(4-hydroxy-3-methoxybenzyl)-N'-(4-(piperidin-1-yl)benzylidene)-1H-1,2,3-triazole-4-carbohydrazide (**3g**).

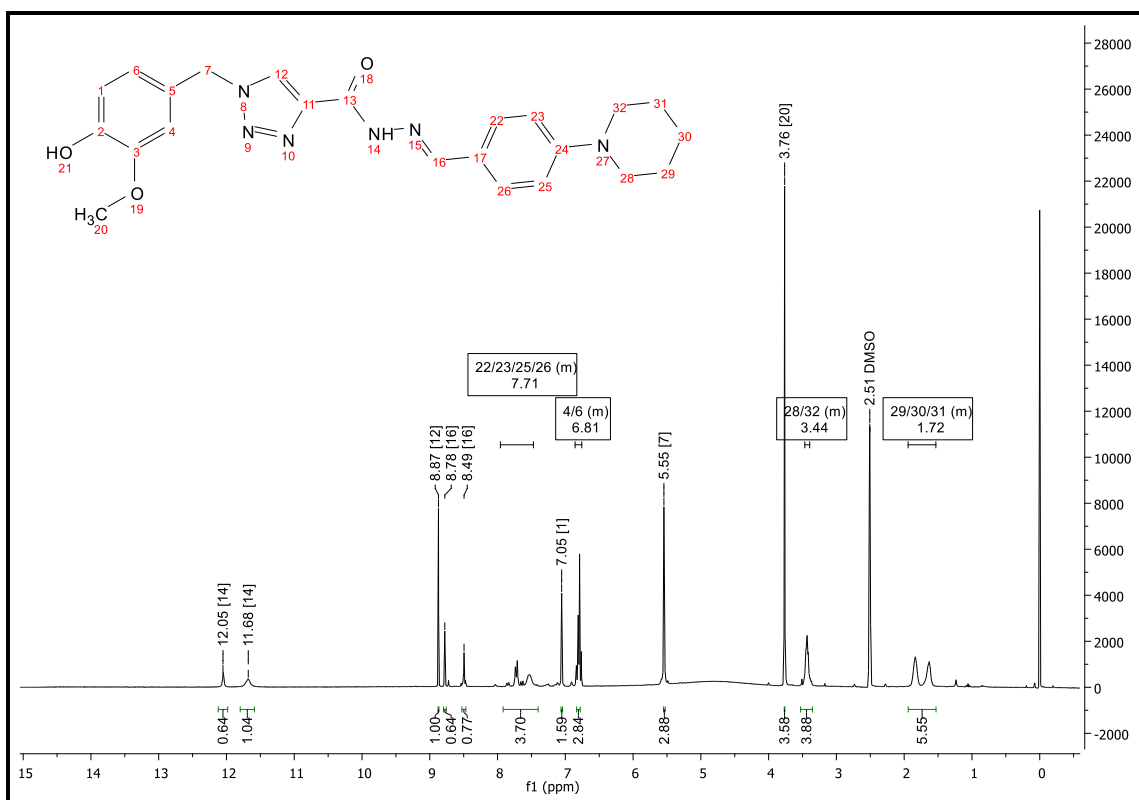

Figure S 17. <sup>1</sup>H NMR spectra of (E)-1-(4-hydroxy-3-methoxybenzyl)-N'-(4-(piperidin-1-yl)benzylidene)-1H-1,2,3-triazole-4-carbohydrazide (**3g**).

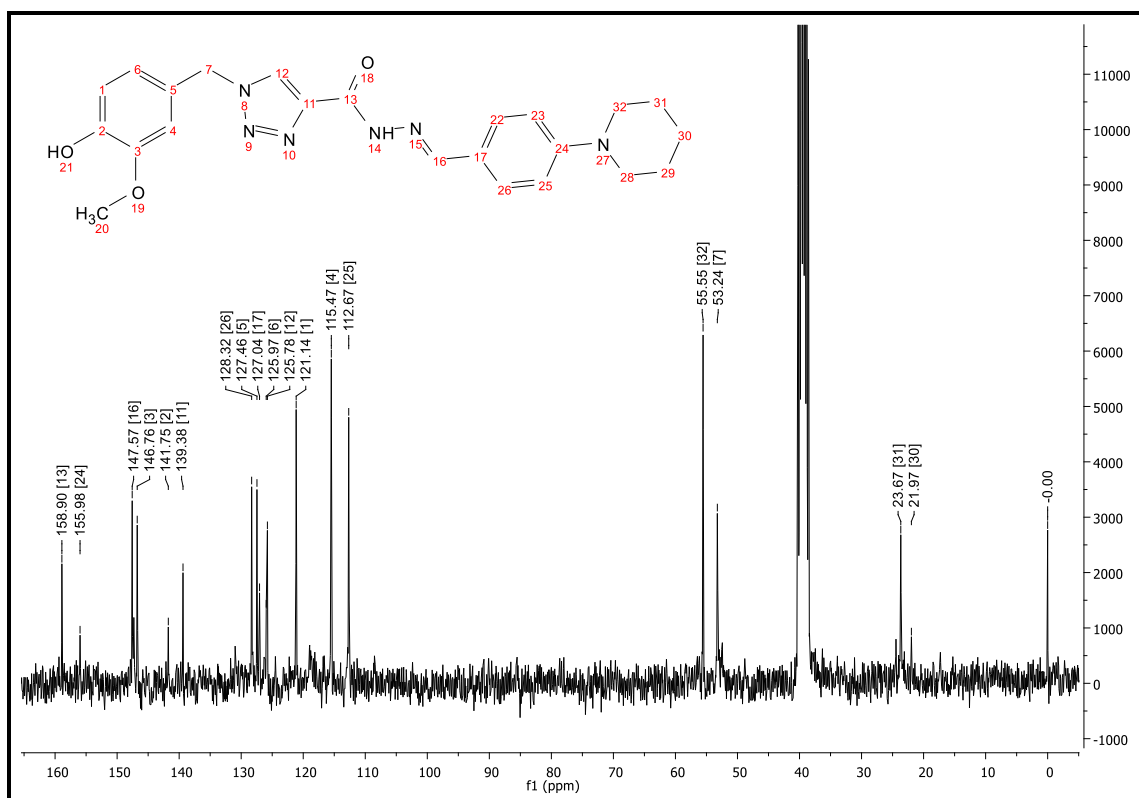

Figure S 18. <sup>13</sup>C NMR spectra of (E)-1-(4-hydroxy-3-methoxybenzyl)-N'-(4-(piperidin-1-yl)benzylidene)-1H-1,2,3-triazole-4-carbohydrazide (**3g**).

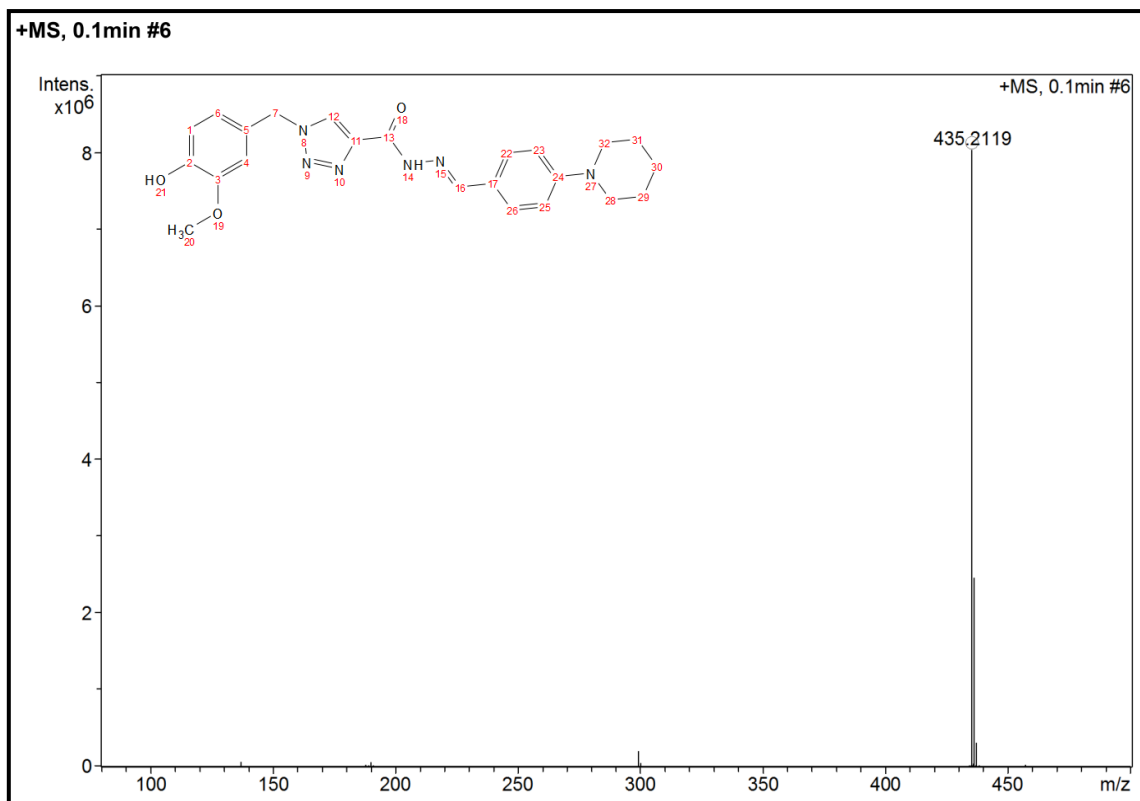

Figure S 19. HR-MS spectra of (E)-1-(4-hydroxy-3-methoxybenzylidene)-N'-(4-(piperidin-1-yl)benzylidene)-1H-1,2,3-triazole-4-carbohydrazide (**3g**).

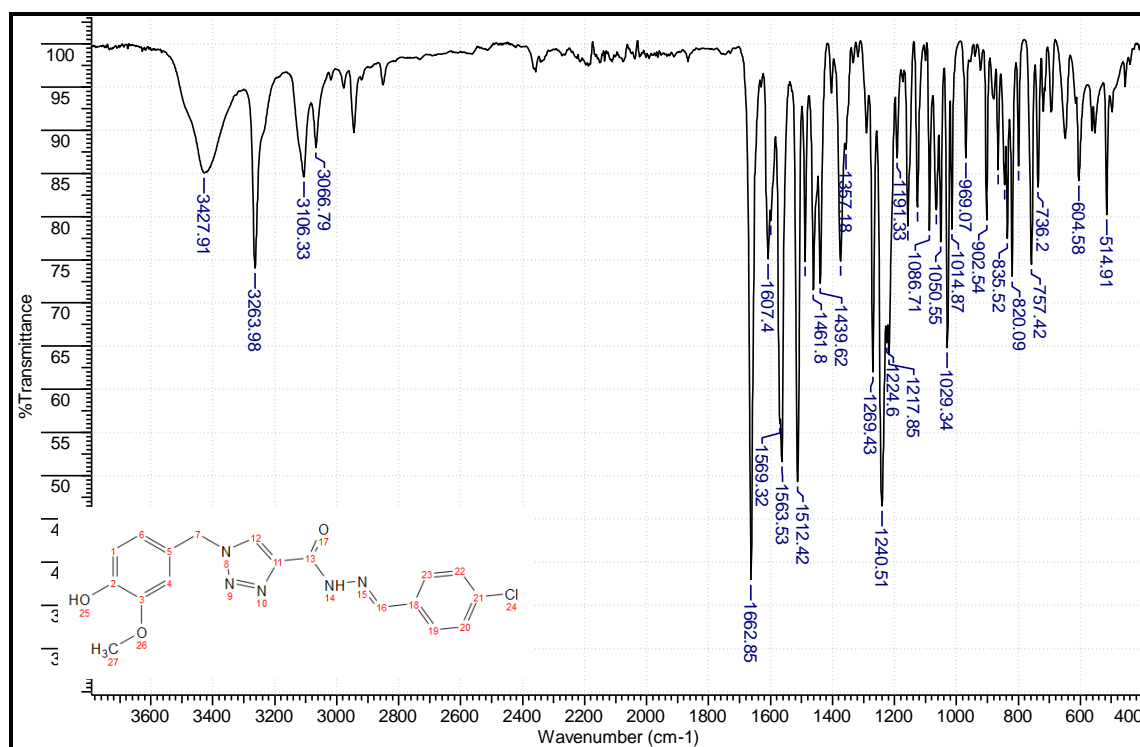

Figure S 20. Absorption spectra in the infrared region of (E)-N'-(4-chlorobenzylidene)-1-(4-hydroxy-3-methoxybenzylidene)-1H-1,2,3-triazole-4-carbohydrazide (**3h**).

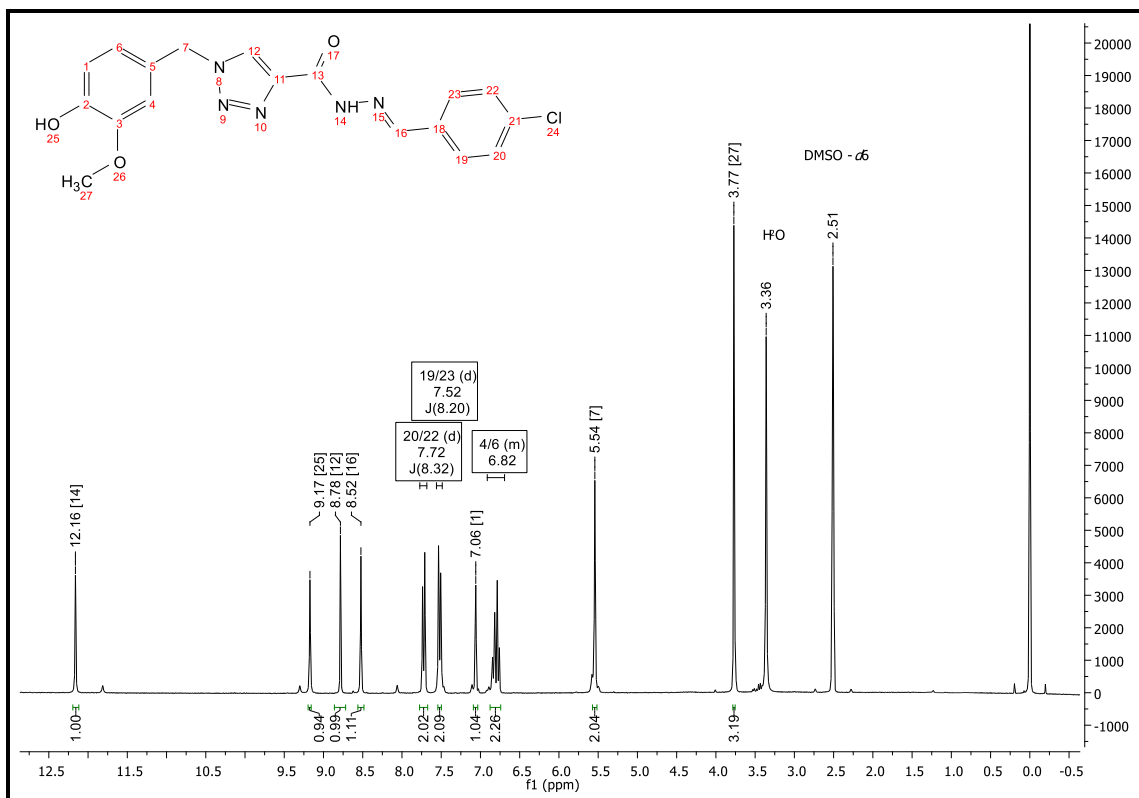

Figure S 21. <sup>1</sup>H NMR spectra of (E)-N'-(4-chlorobenzylidene)-1-(4-hydroxy-3-methoxybenzyl)-1H-1,2,3-triazole-4-carbohydrazide (**3h**).

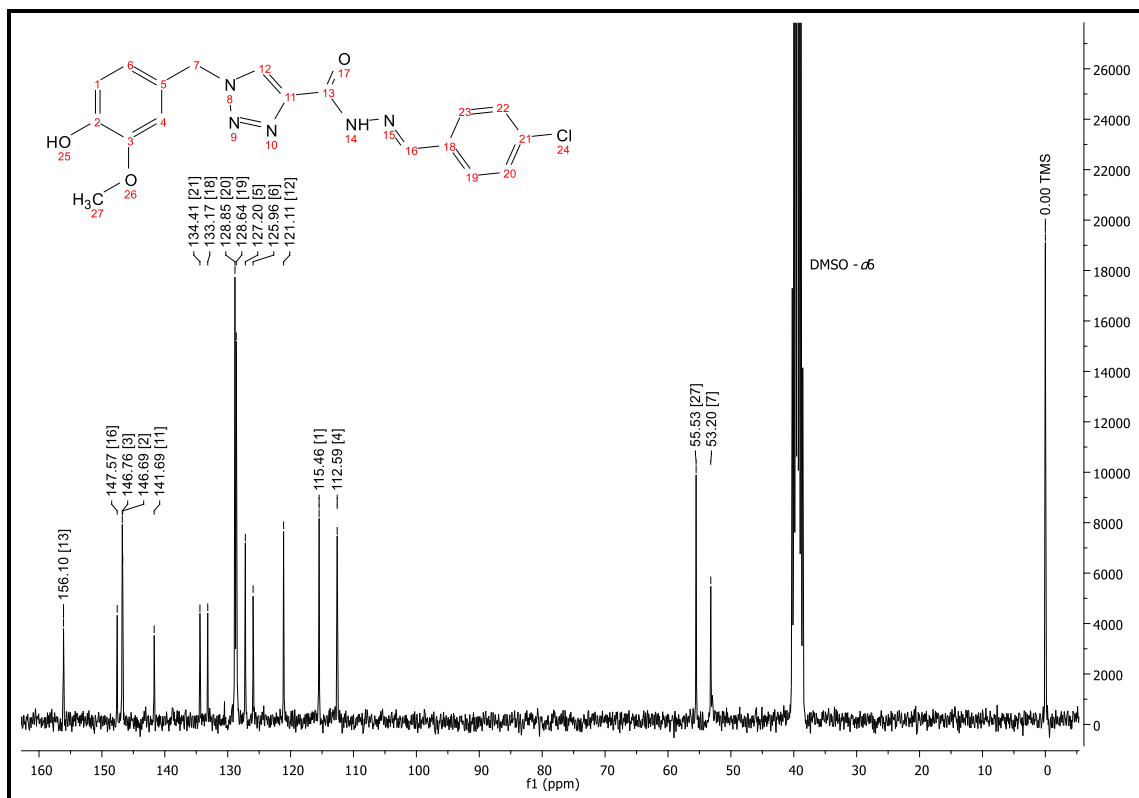

Figure S 22. <sup>13</sup>C NMR spectra of (E)-N'-(4-chlorobenzylidene)-1-(4-hydroxy-3-methoxybenzyl)-1H-1,2,3-triazole-4-carbohydrazide (**3h**).



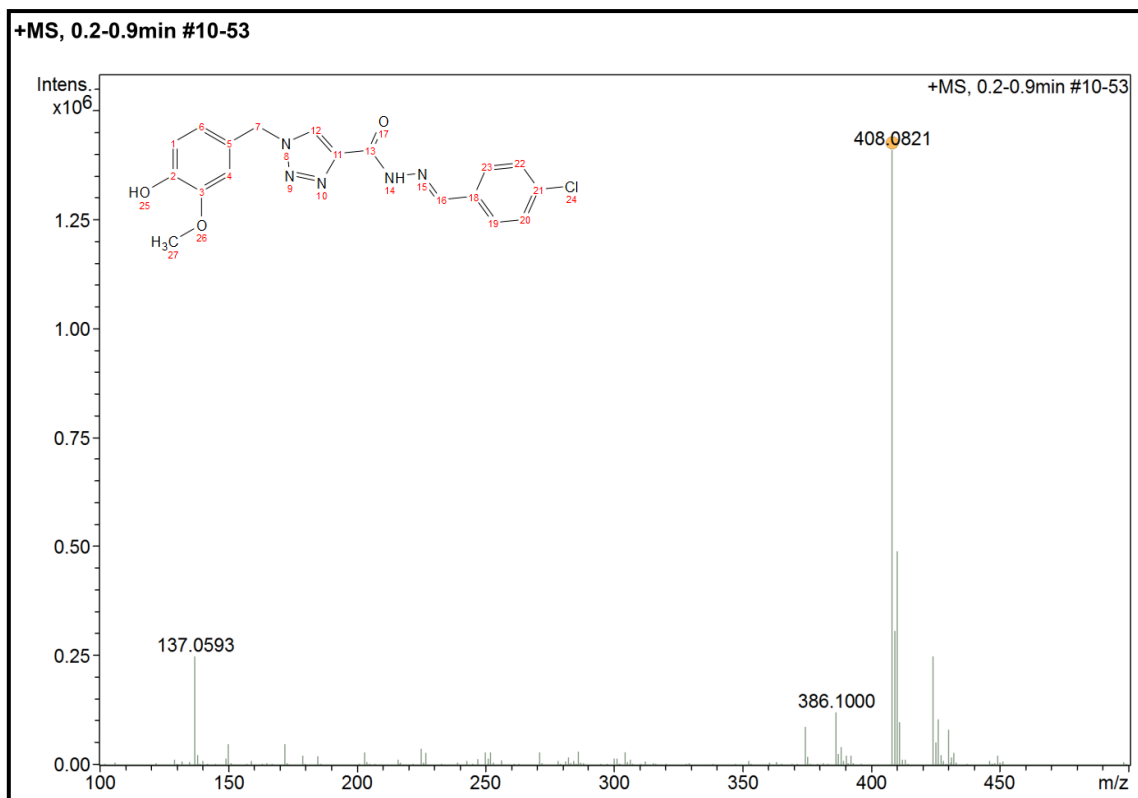

Figure S 23. HR-MS spectra of (E)-N'-(4-chlorobenzylidene)-1-(4-hydroxy-3-methoxybenzyl)-1H-1,2,3-triazole-4-carbohydrazide (**3h**).

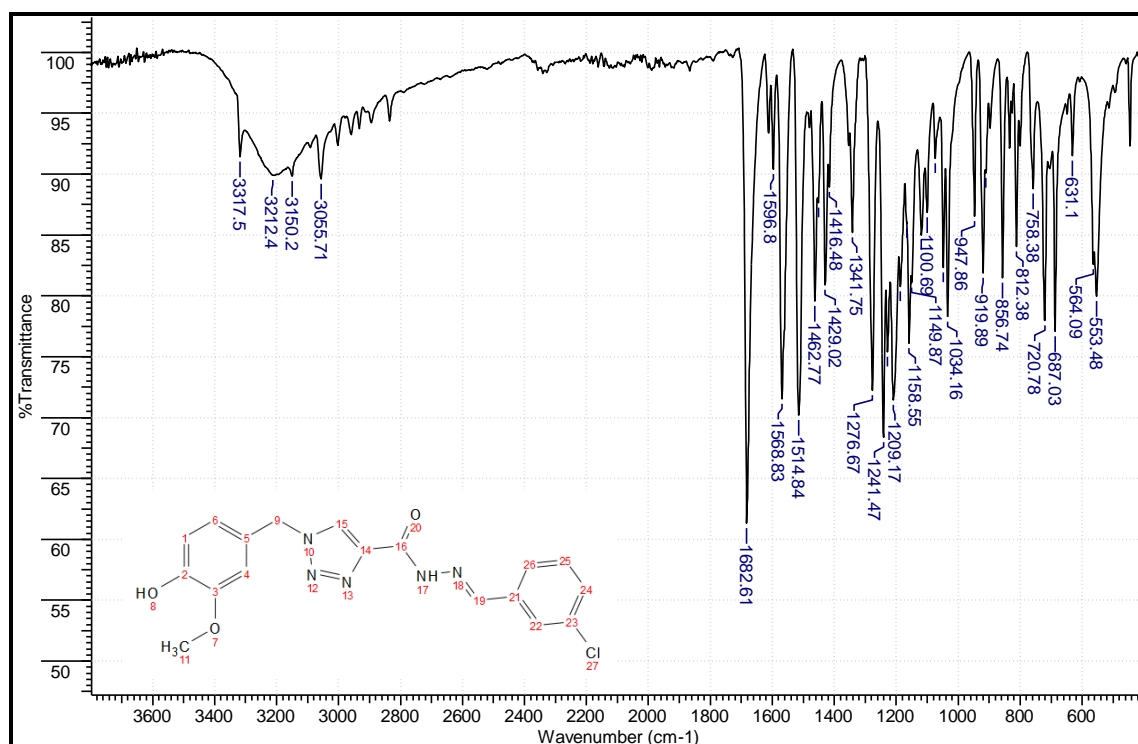

Figure S 24. Absorption spectra in the infrared region of (E)-N'-(3-chlorobenzylidene)-1-(4-hydroxy-3-methoxybenzyl)-1H-1,2,3-triazole-4-carbohydrazide (**3i**).

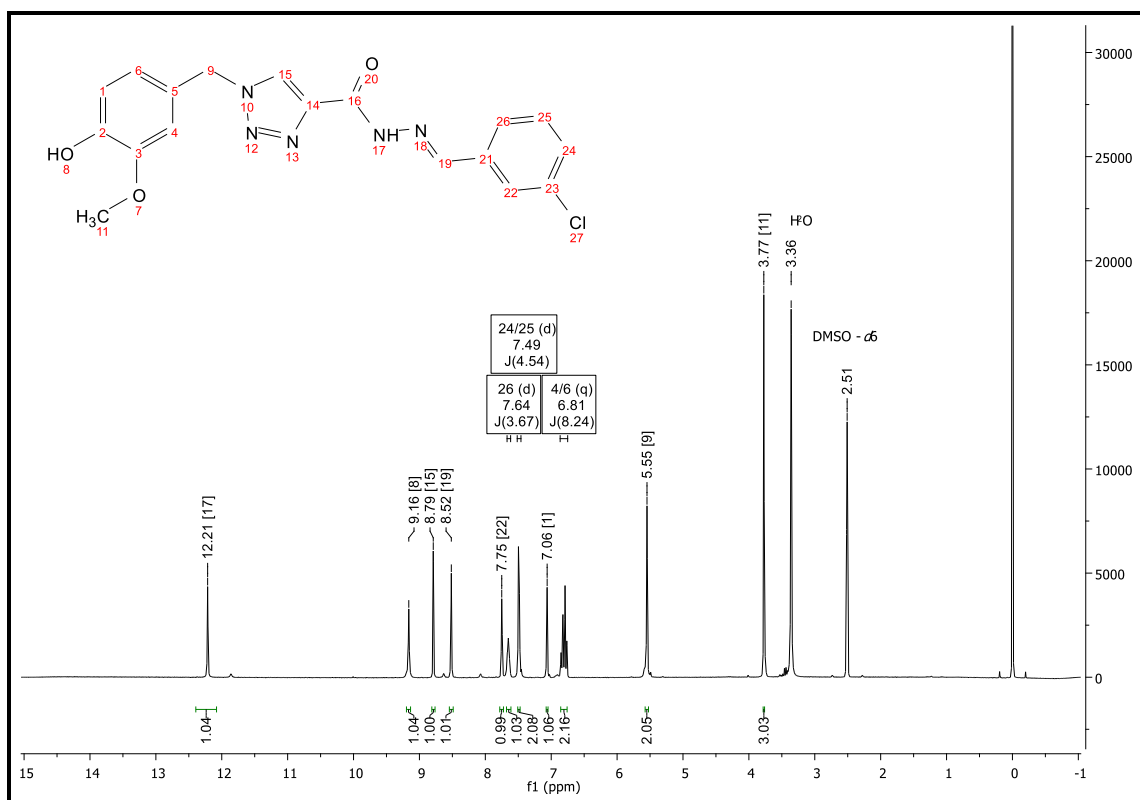

Figure S 25. <sup>1</sup>H NMR spectra of (E)-N'-(3-chlorobenzylidene)-1-(4-hydroxy-3-methoxybenzyl)-1H-1,2,3-triazole-4-carbohydrazide (3i).

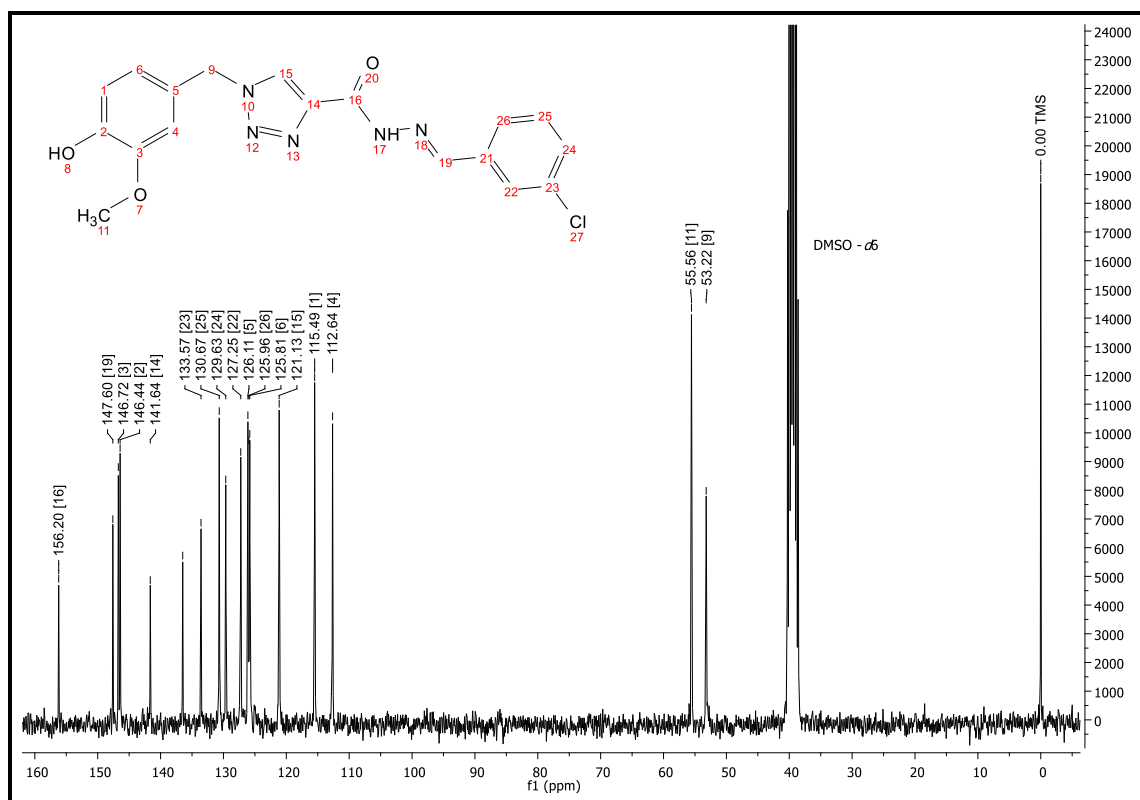

Figure S 26. <sup>13</sup>C NMR spectra of (E)-N'-(3-chlorobenzylidene)-1-(4-hydroxy-3-methoxybenzyl)-1H-1,2,3-triazole-4-carbohydrazide (3i).

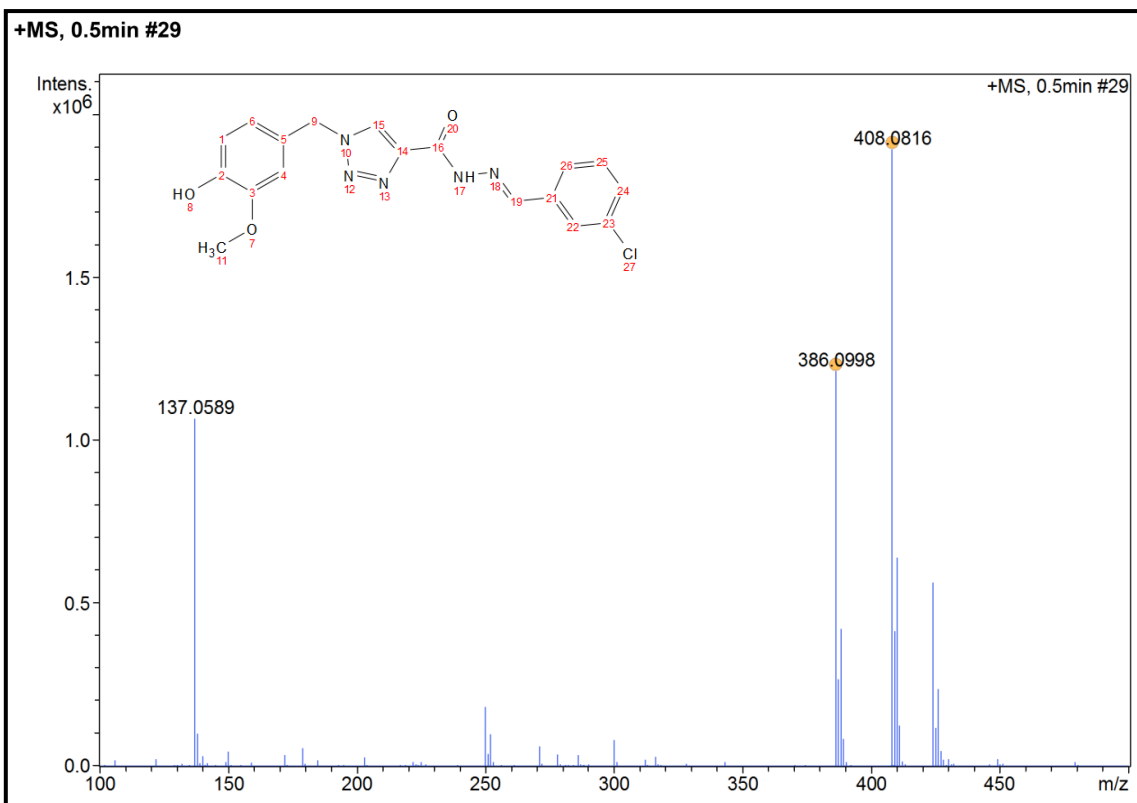

Figure S 27. HR-MS spectra of (E)-N'-(3-chlorobenzylidene)-1-(4-hydroxy-3-methoxybenzyl)-1H-1,2,3-triazole-4-carbohydrazide (**3i**).

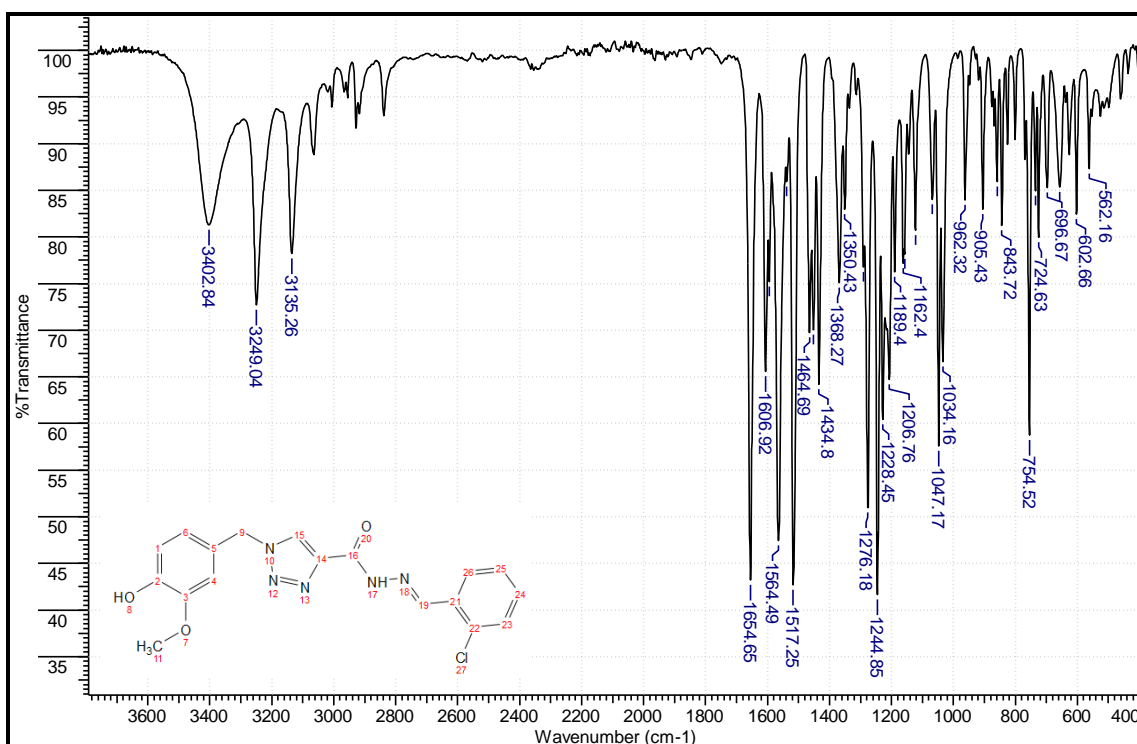

Figure S 28. Absorption spectra in the infrared region of (E)-N'-(2-chlorobenzylidene)-1-(4-hydroxy-3-methoxybenzyl)-1H-1,2,3-triazole-4-carbohydrazide (**3j**).

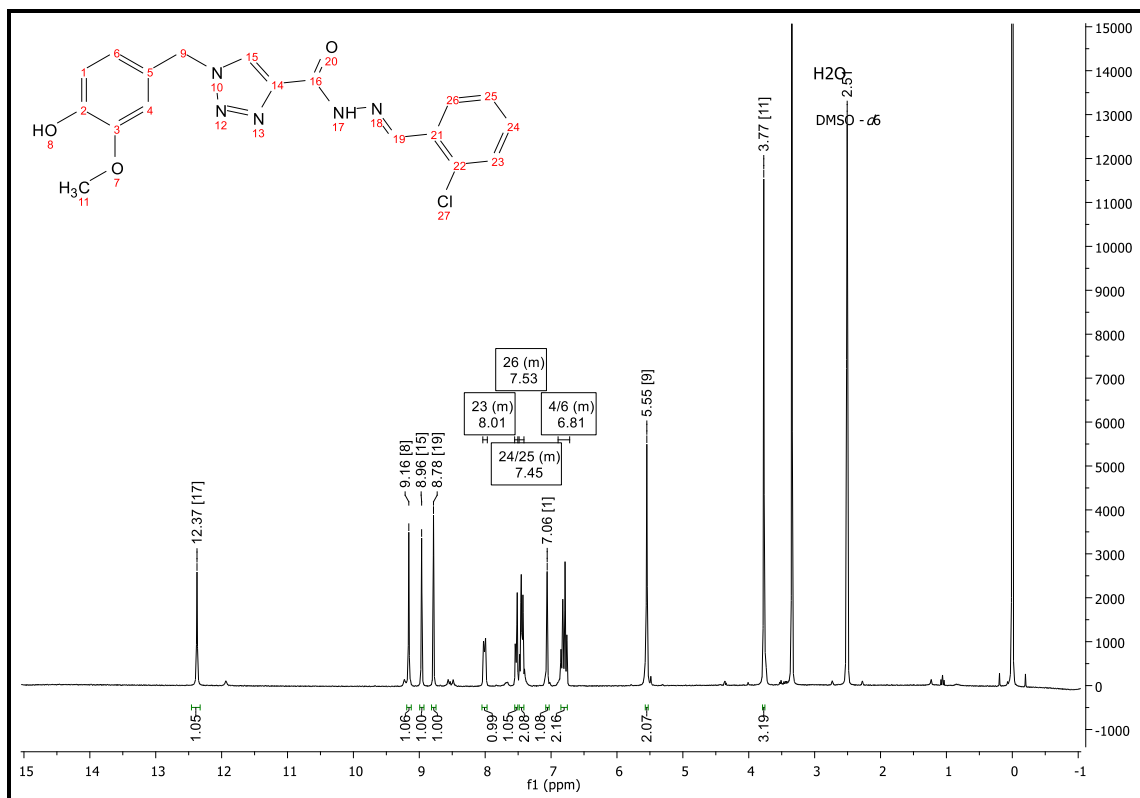

Figure S 29. <sup>1</sup>H NMR spectra of (E)-N'-(2-chlorobenzylidene)-1-(4-hydroxy-3-methoxybenzyl)-1H-1,2,3-triazole-4-carbohydrazide (**3j**).

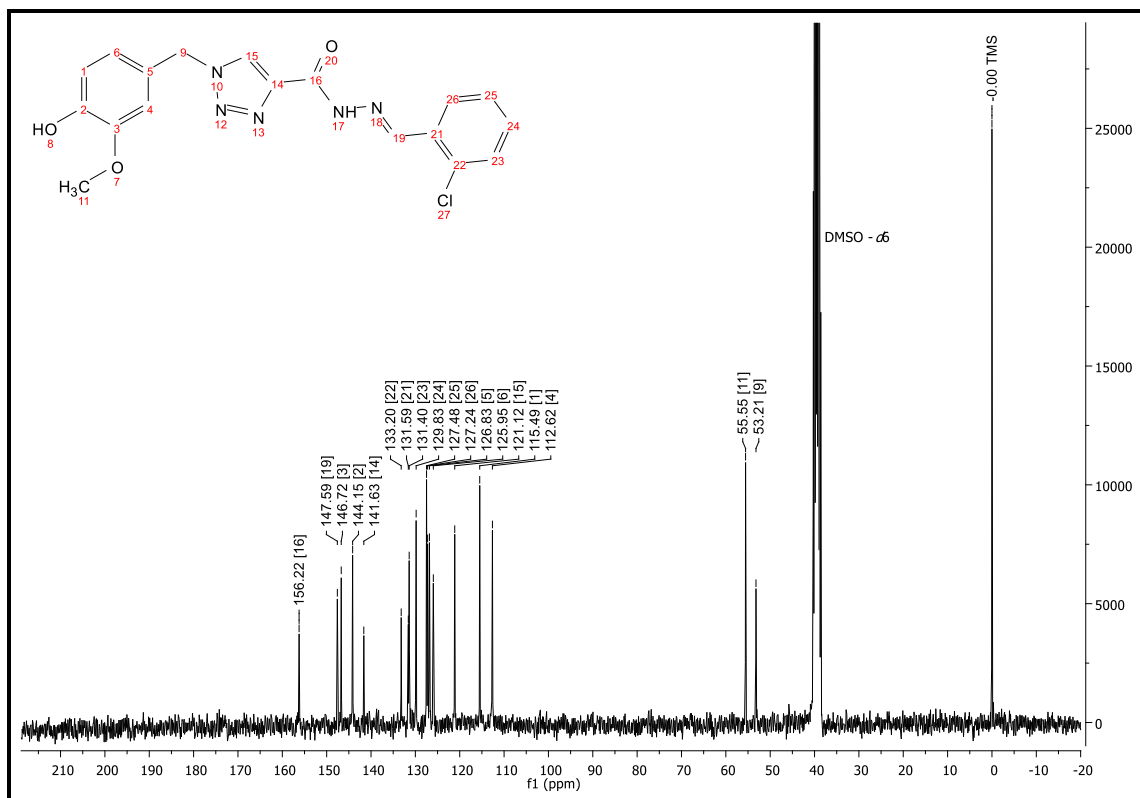

Figure S 30. <sup>13</sup>C NMR spectra of (E)-N'-(2-chlorobenzylidene)-1-(4-hydroxy-3-methoxybenzyl)-1H-1,2,3-triazole-4-carbohydrazide (**3j**).

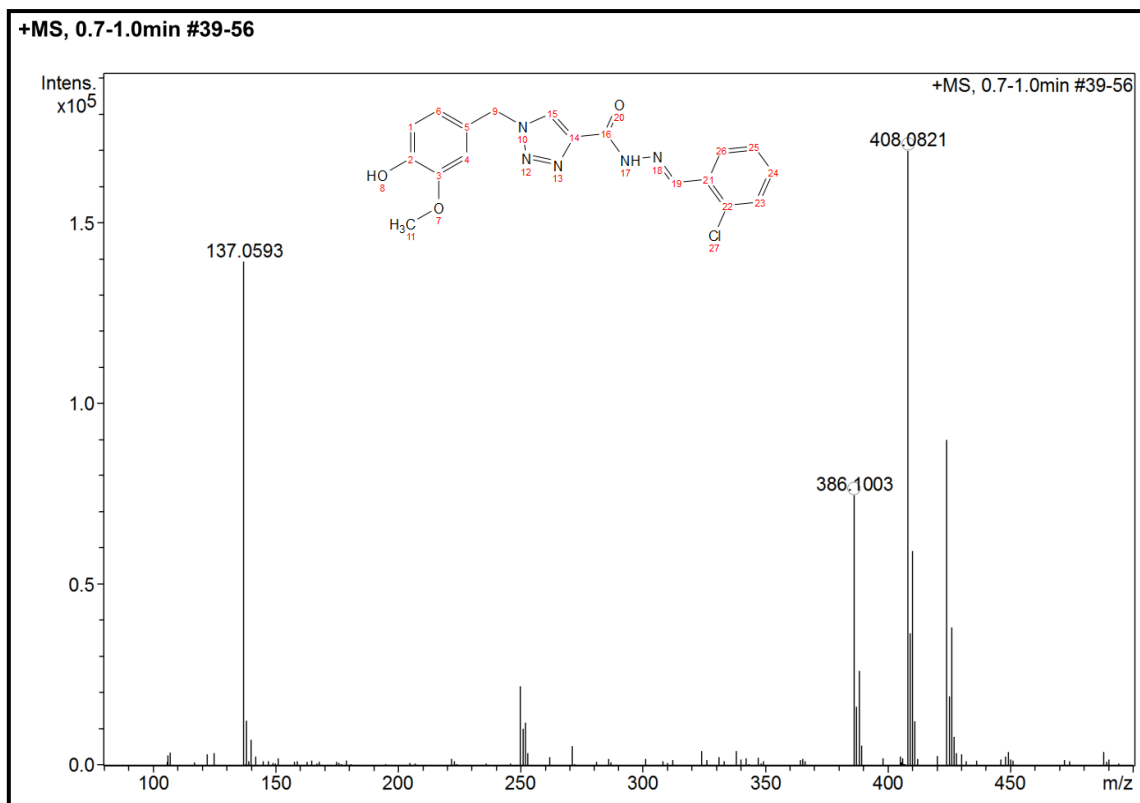

Figure S 31. HR-MS spectra of (E)-N'-(2-chlorobenzylidene)-1-(4-hydroxy-3-methoxybenzyl)-1H-1,2,3-triazole-4-carbohydrazide (**3j**).

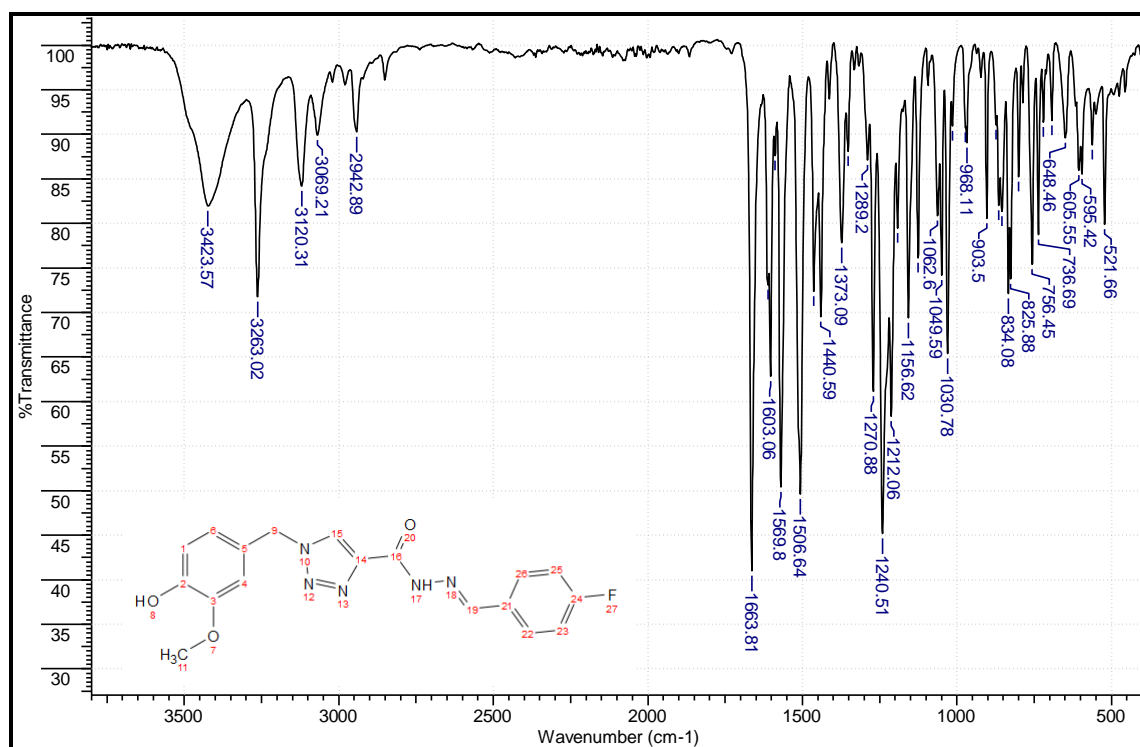

Figure S 32. Absorption spectra in the infrared region of (E)-N'-(4-fluorobenzylidene)-1-(4-hydroxy-3-methoxybenzyl)-1H-1,2,3-triazole-4-carbohydrazide (**3k**).

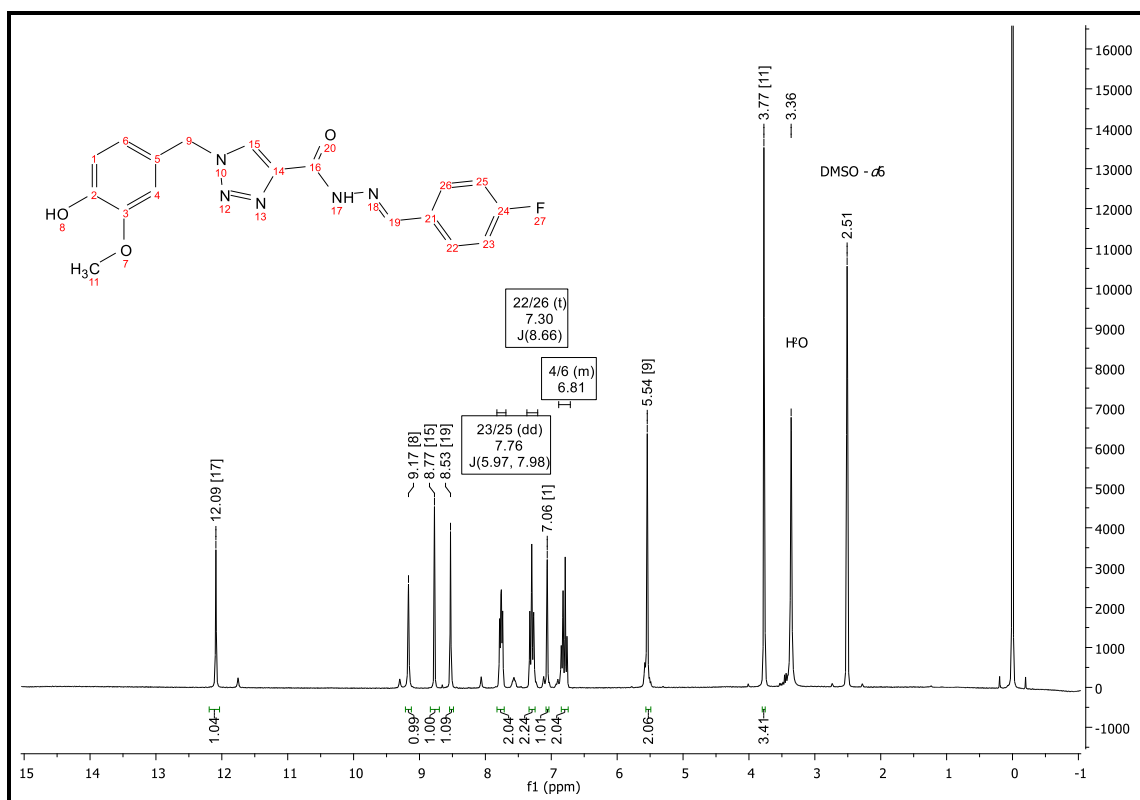

Figure S 33. <sup>1</sup>H NMR spectra of (E)-N'-(4-fluorobenzylidene)-1-(4-hydroxy-3-methoxybenzyl)-1H-1,2,3-triazole-4-carbohydrazide (**3k**).

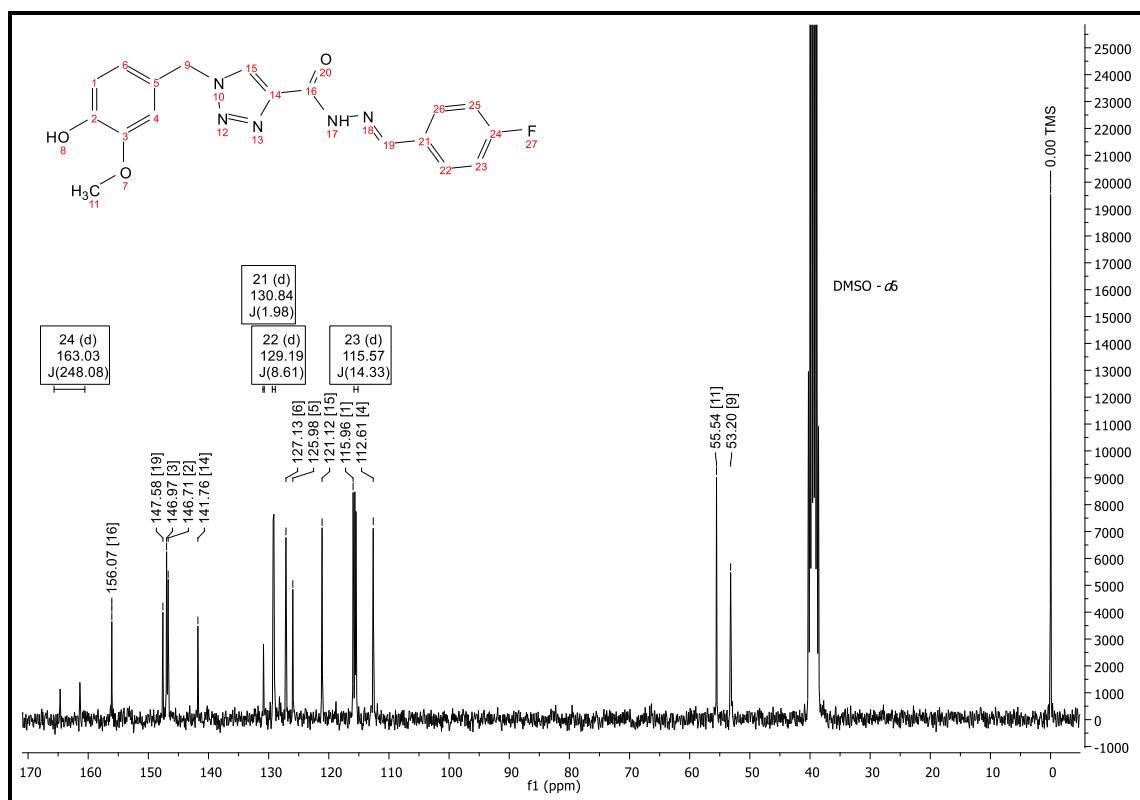

Figure S 34. <sup>13</sup>C NMR spectra of (E)-N'-(4-fluorobenzylidene)-1-(4-hydroxy-3-methoxybenzyl)-1H-1,2,3-triazole-4-carbohydrazide (**3k**).

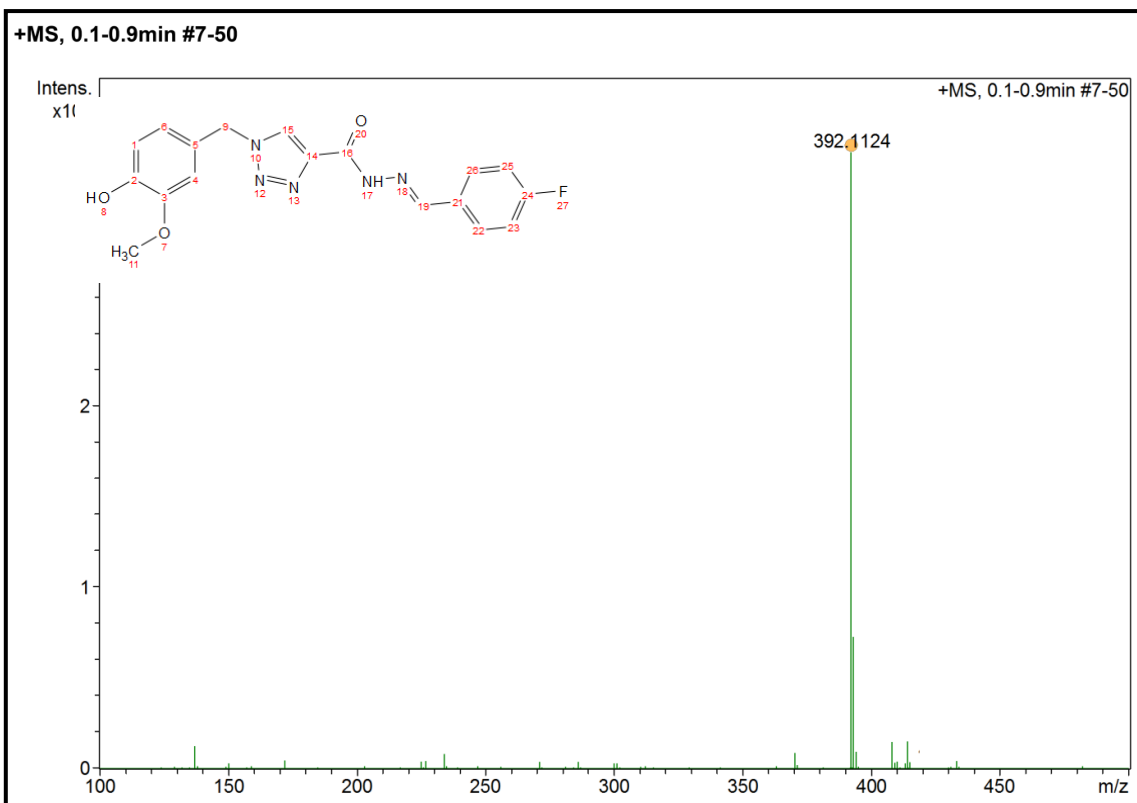

Figure S 35. HR-MS spectra of (E)-N'-(4-fluorobenzylidene)-1-(4-hydroxy-3-methoxybenzyl)-1H-1,2,3-triazole-4-carbohydrazide (**3k**).

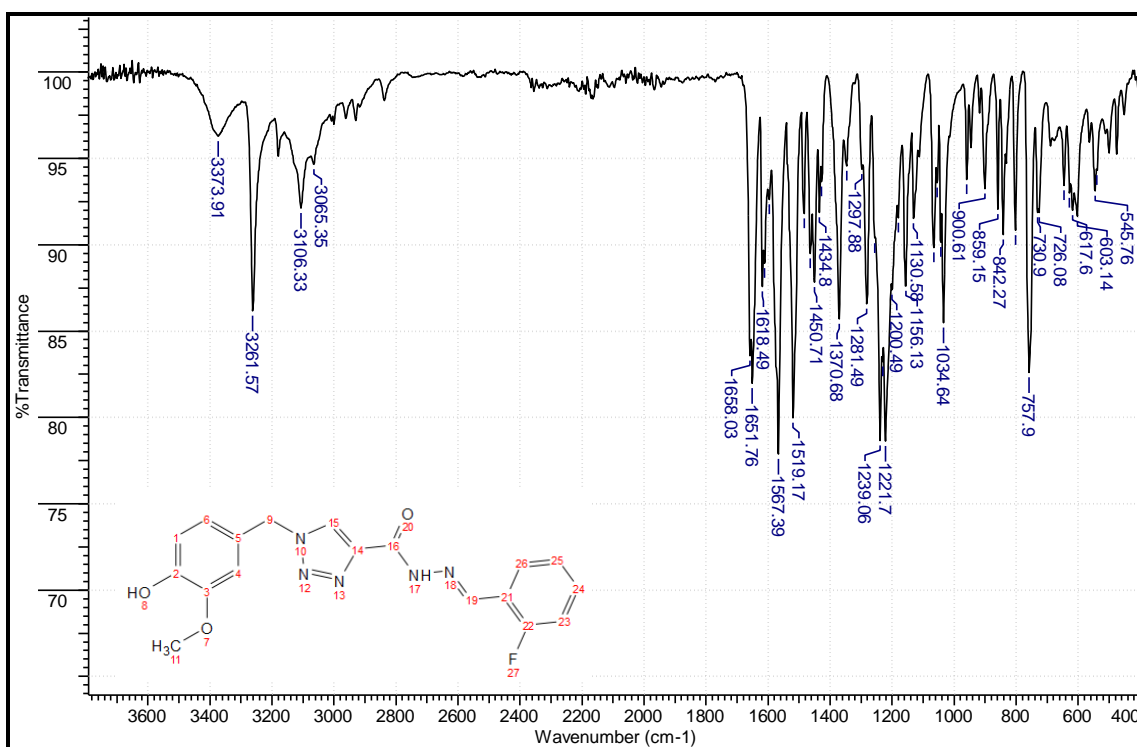

Figure S 36. Absorption spectra in the infrared region of (E)-N'-(2-fluorobenzylidene)-1-(4-hydroxy-3-methoxybenzyl)-1H-1,2,3-triazole-4-carbohydrazide (**3l**).

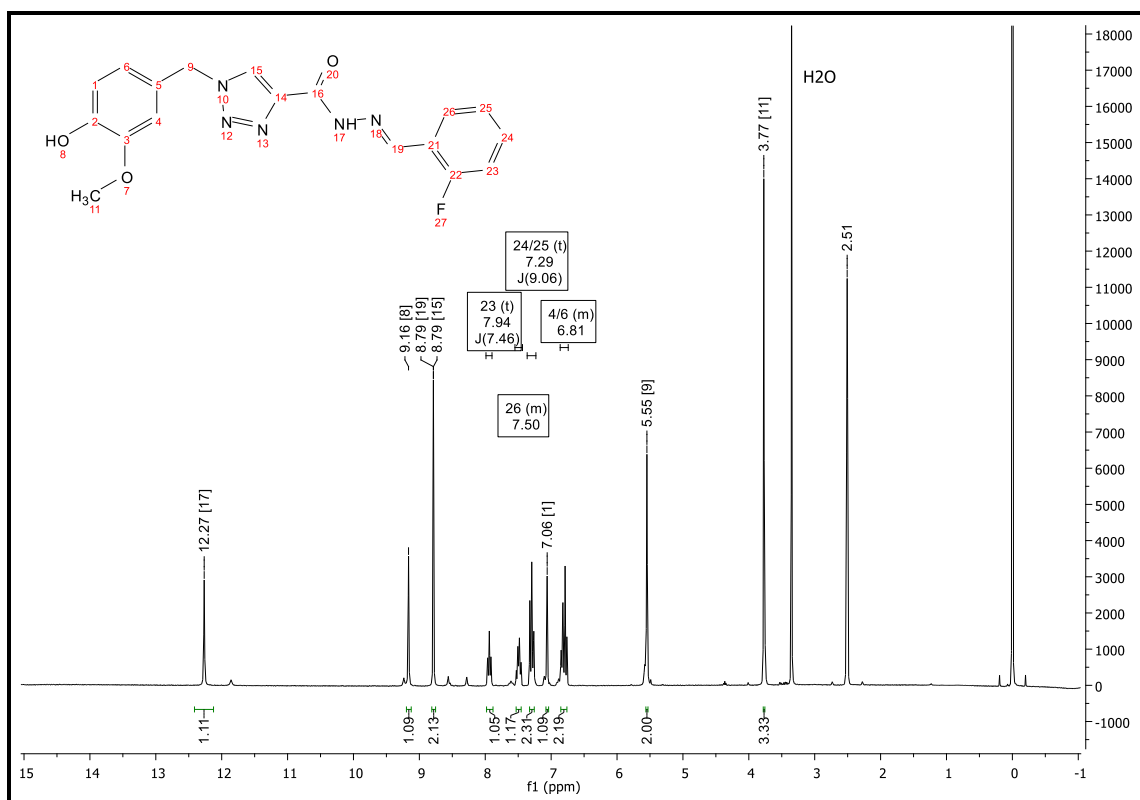

Figure S 37. <sup>1</sup>H NMR spectra of (E)-N'-(2-fluorobenzylidene)-1-(4-hydroxy-3-methoxybenzyl)-1H-1,2,3-triazole-4-carbohydrazide (**3I**).

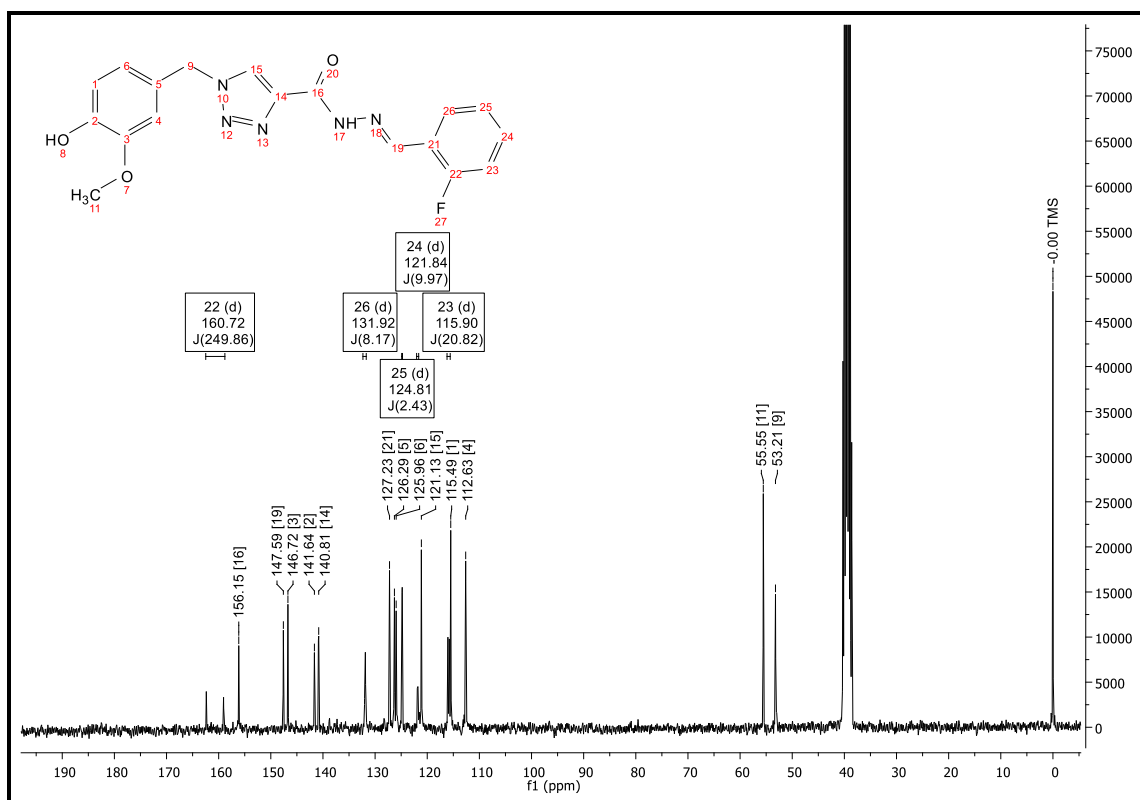

Figure S 38. <sup>13</sup>C NMR spectra of (E)-N'-(2-fluorobenzylidene)-1-(4-hydroxy-3-methoxybenzyl)-1H-1,2,3-triazole-4-carbohydrazide (**3I**).



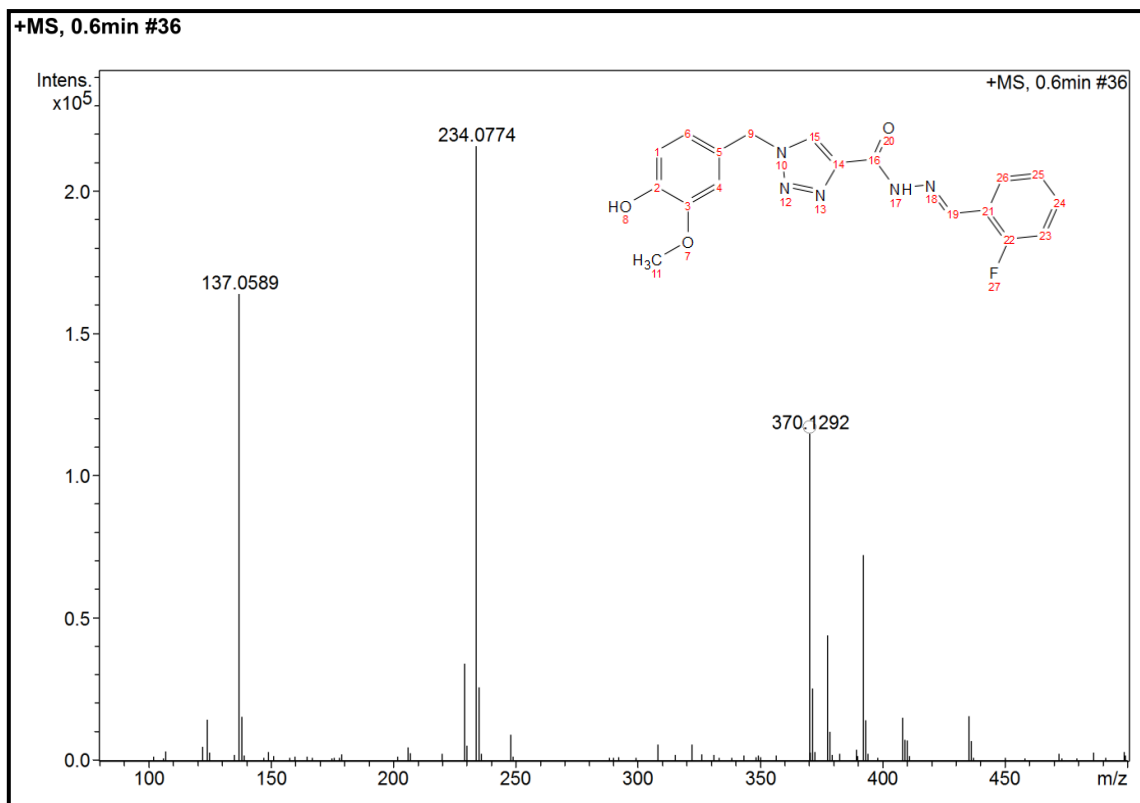

Figure S 39. HR-MS spectra of (E)-N'-(2-fluorobenzylidene)-1-(4-hydroxy-3-methoxybenzyl)-1H-1,2,3-triazole-4-carbohydrazide (**3l**).

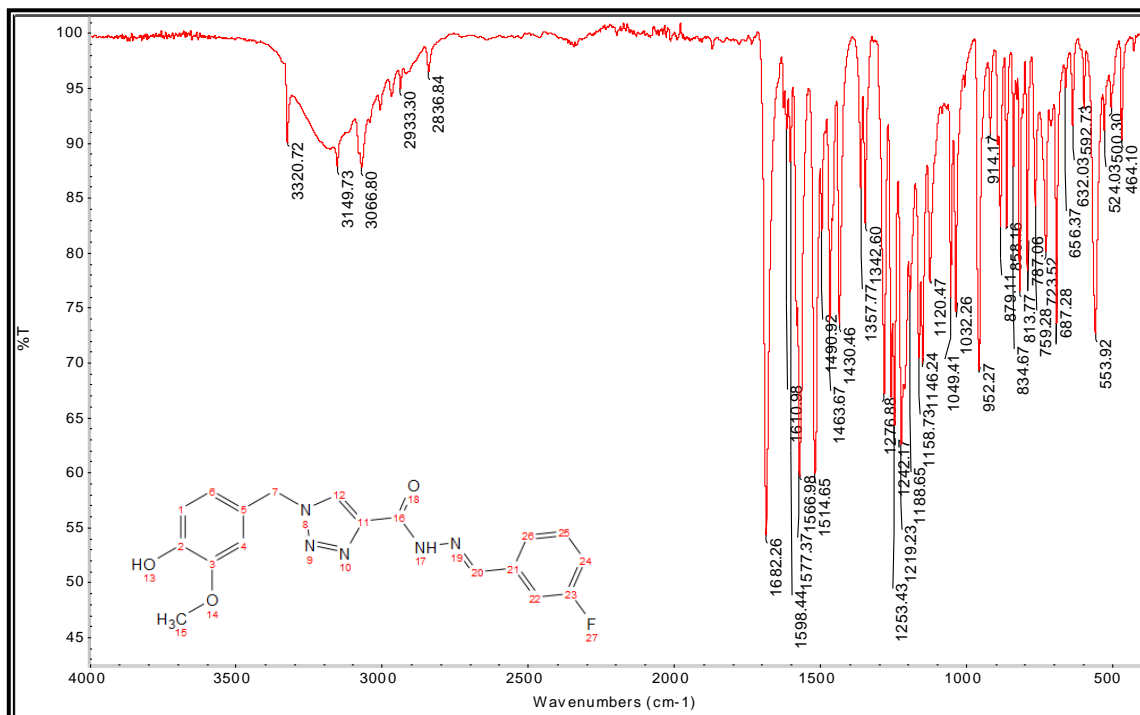

Figure S 40. Absorption spectra in the infrared region of (E)-N'-(3-fluorobenzylidene)-1-(4-hydroxy-3-methoxybenzyl)-1H-1,2,3-triazole-4-carbohydrazide (**3m**).

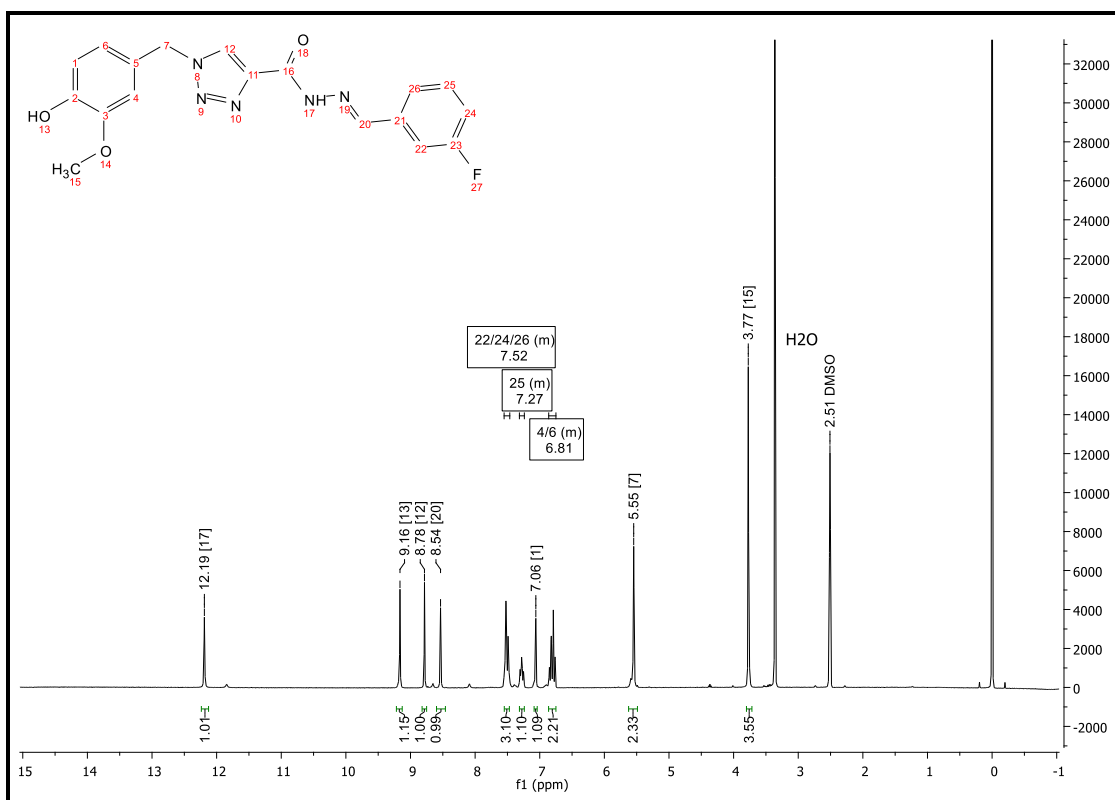

Figure S 41. <sup>1</sup>H NMR spectra of (E)-N'-(3-fluorobenzylidene)-1-(4-hydroxy-3-methoxybenzyl)-1H-1,2,3-triazole-4-carbohydrazide (**3m**).

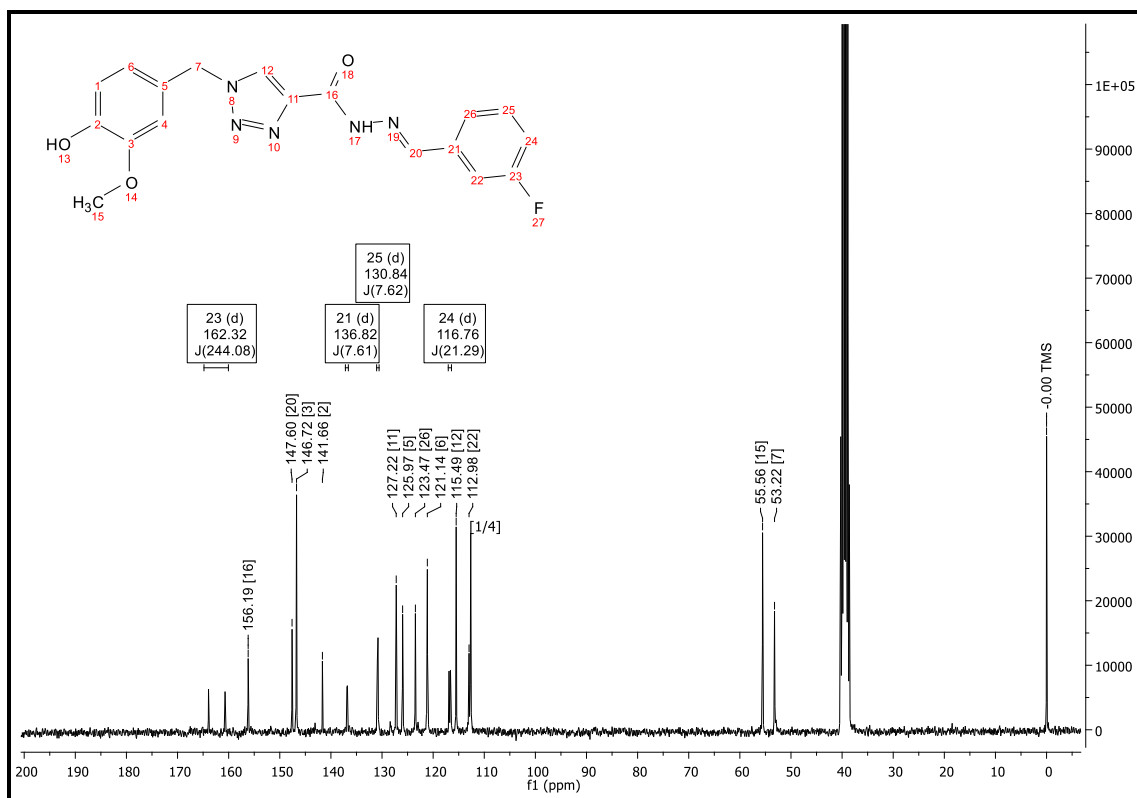

Figure S 42. <sup>13</sup>C NMR spectra of (E)-N'-(3-fluorobenzylidene)-1-(4-hydroxy-3-methoxybenzyl)-1H-1,2,3-triazole-4-carbohydrazide (**3m**).

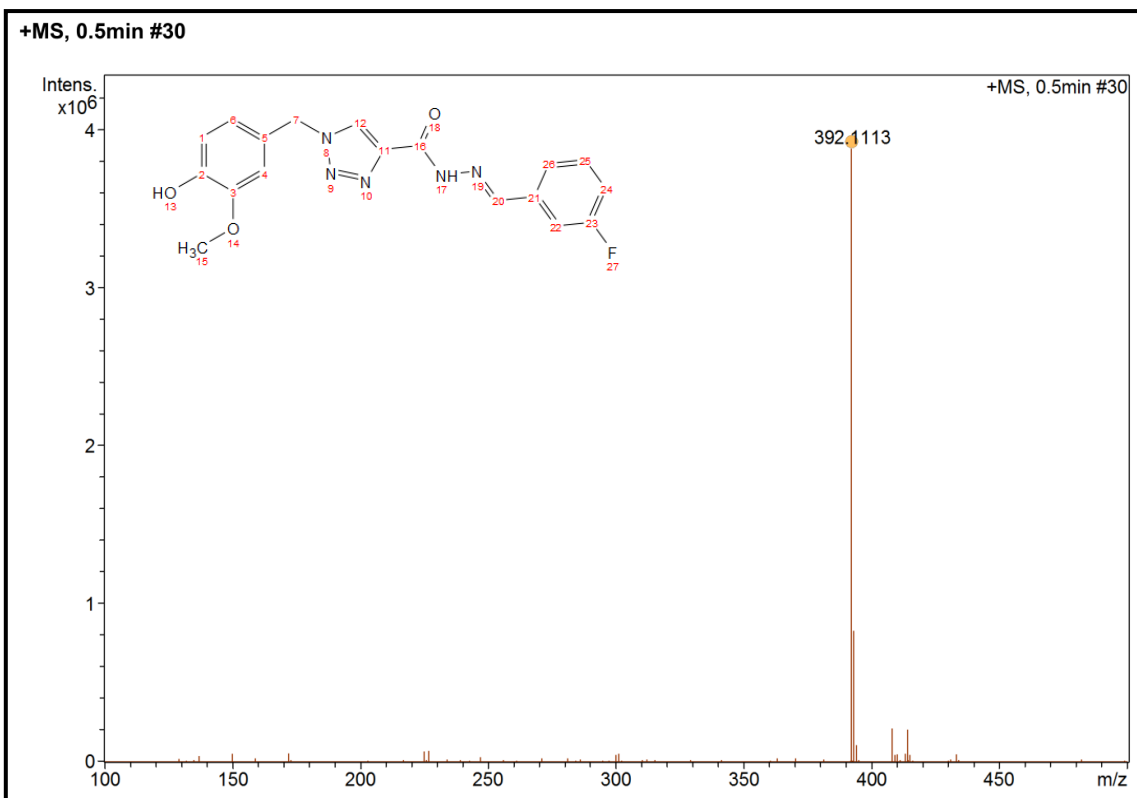

Figure S 43. HR-MS spectra of (E)-N'-(3-fluorobenzylidene)-1-(4-hydroxy-3-methoxybenzyl)-1H-1,2,3-triazole-4-carbohydrazide (**3m**).

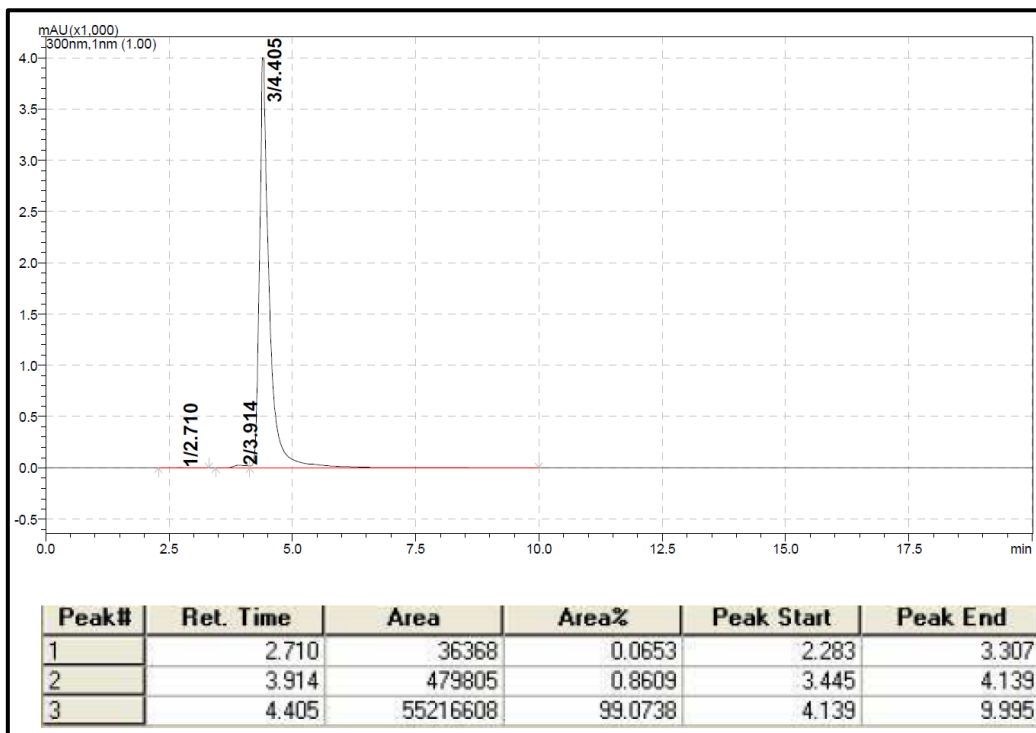

Figure S 44. Chromatogram of (E)-1-(4-hydroxy-3-methoxybenzyl)-N'-(4-hydroxybenzylidene)-1H-1,2,3-triazole-4-carbohydrazide (**3a**).

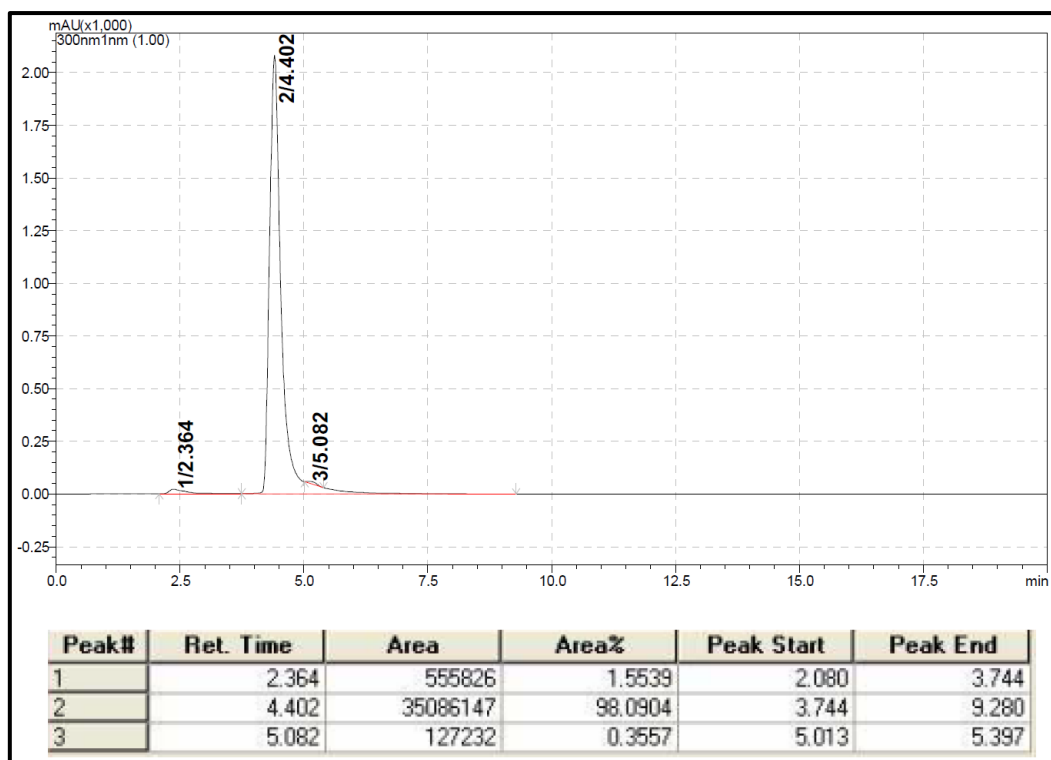

Figure S 45. Chromatogram of (E)-N'-(3,5-dihydroxybenzylidene)-1-(4-hydroxy-3-methoxybenzyl)-1H-1,2,3-triazole-4-carbohydrazide (**3b**).

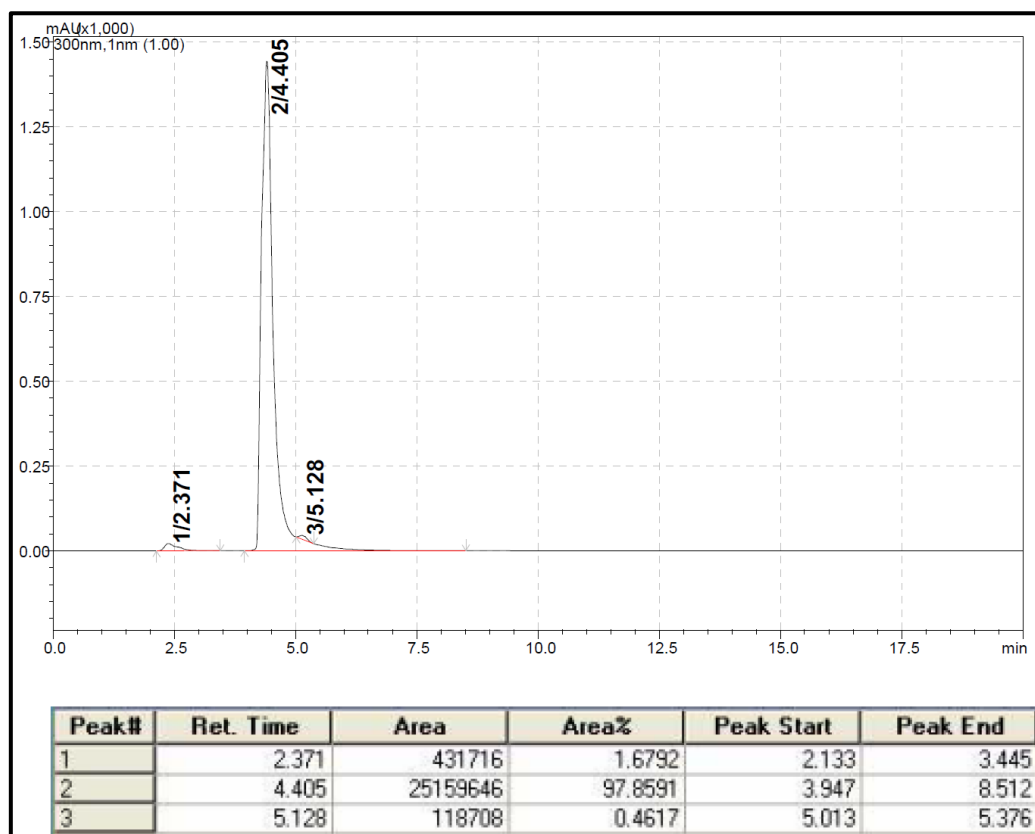

Figure S 46. Chromatogram of (E)-N'-(3,5-dimethoxybenzylidene)-1-(4-hydroxy-3-methoxybenzyl)-1H-1,2,3-triazole-4-carbohydrazide (**3d**).

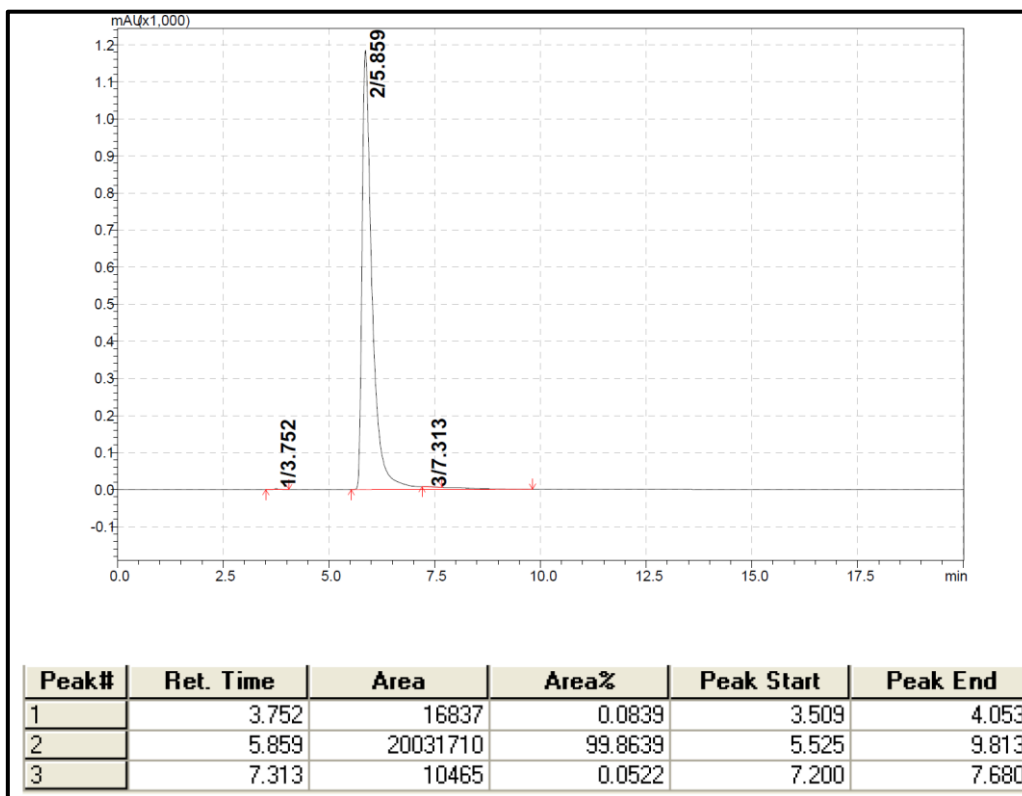

Figure S 47. Chromatogram of (E)-1-(4-hydroxy-3-methoxybenzyl)-N'-(4-hydroxy-3-methoxybenzylidene)-1H-1,2,3-triazole-4-carbohydrazide (**3e**).

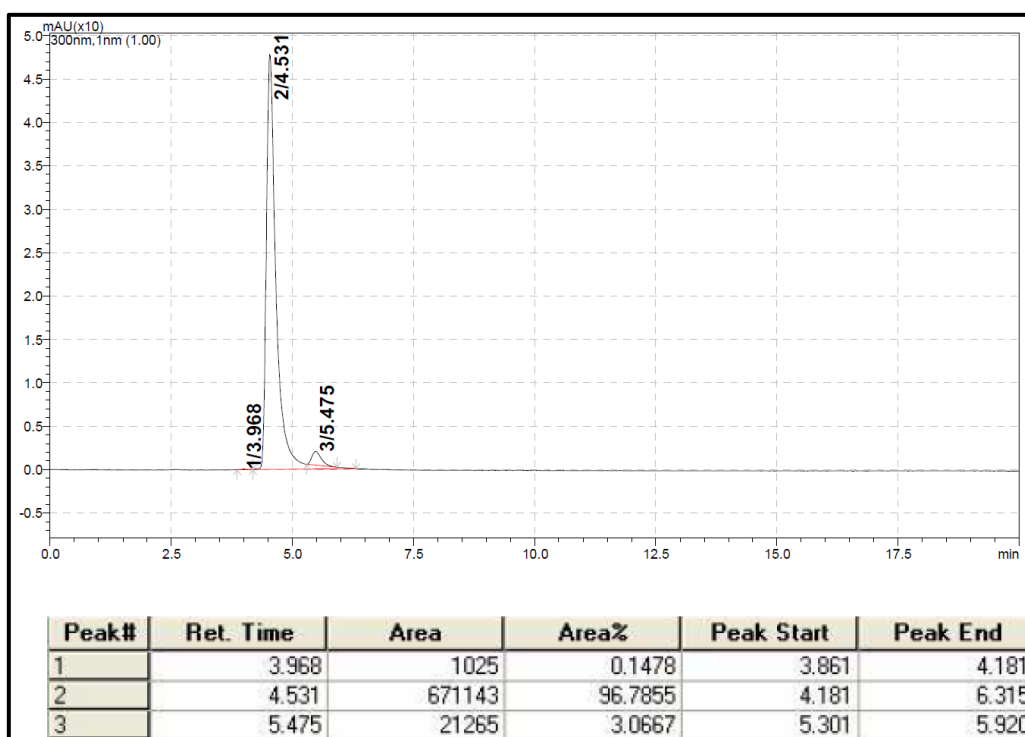

Figure S 48. Chromatogram of (E)-N'-benzylidene-1-(4-hydroxy-3-methoxybenzyl)-1H-1,2,3-triazole-4-carbohydrazide (**3f**).

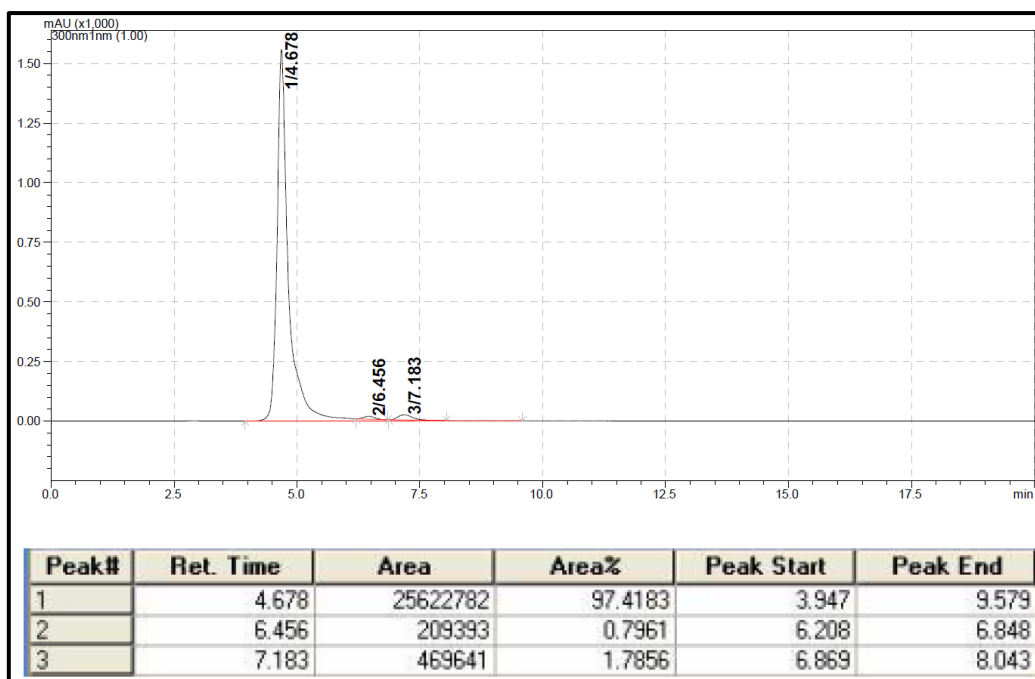

Figure S 49. Chromatogram of (E)-1-(4-hydroxy-3-methoxybenzyl)-N'-(4-(piperidin-1-yl)benzylidene)-1H-1,2,3-triazole-4-carbohydrazide (**3g**).

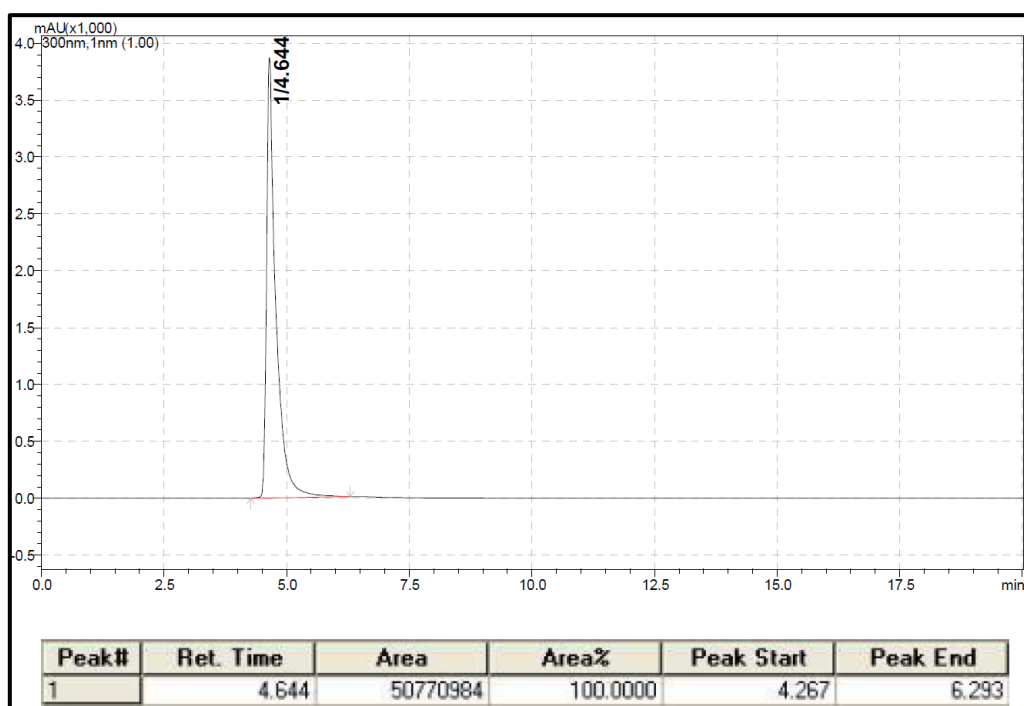

Figure S 50. Chromatogram of (E)-N'-(4-chlorobenzylidene)-1-(4-hydroxy-3-methoxybenzyl)-1H-1,2,3-triazole-4-carbohydrazide (**3h**).

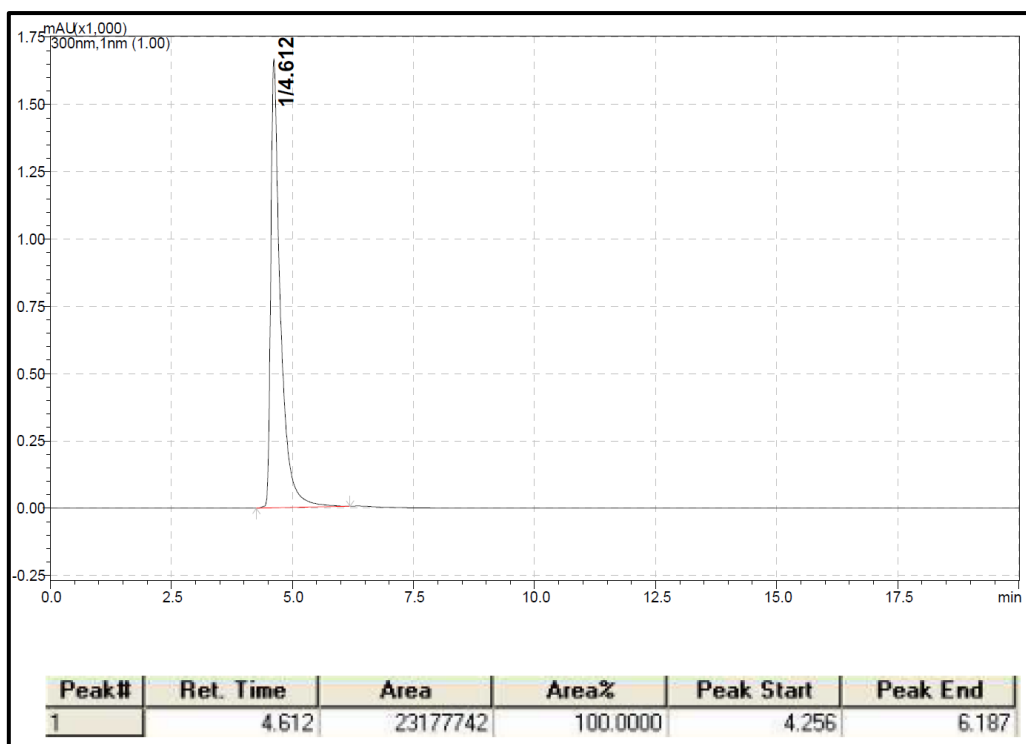

Figure S 51. Chromatogram of (E)-N'-(3-chlorobenzylidene)-1-(4-hydroxy-3-methoxybenzyl)-1H-1,2,3-triazole-4-carbohydrazide (**3i**).

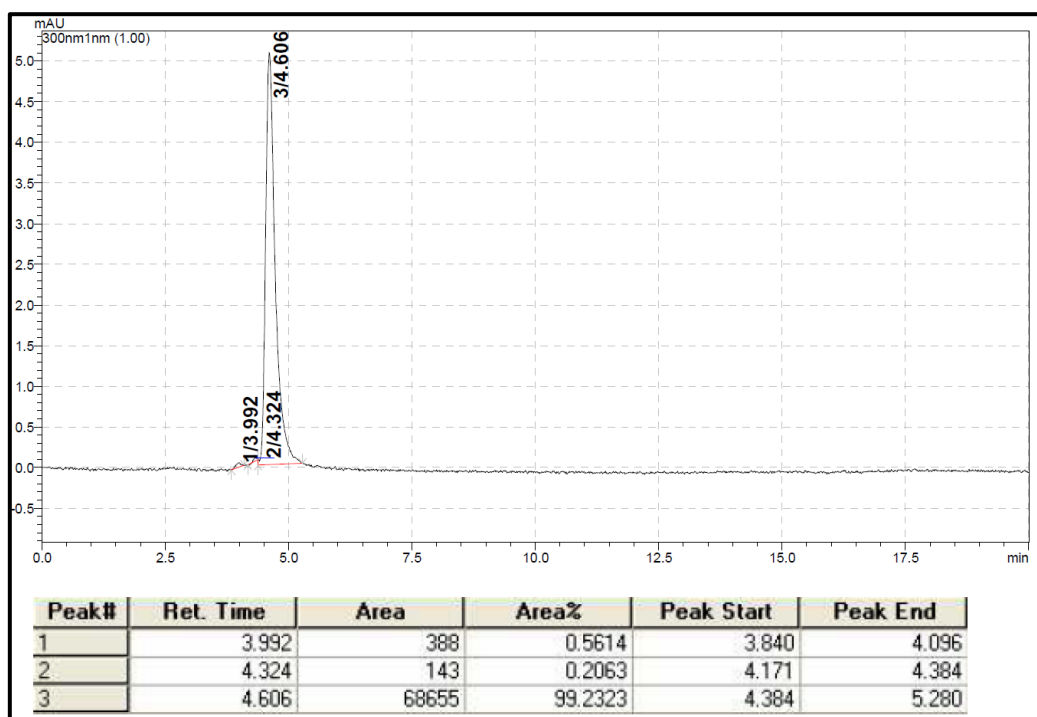

Figure S 52. Chromatogram of (E)-N'-(2-chlorobenzylidene)-1-(4-hydroxy-3-methoxybenzyl)-1H-1,2,3-triazole-4-carbohydrazide (**3j**).

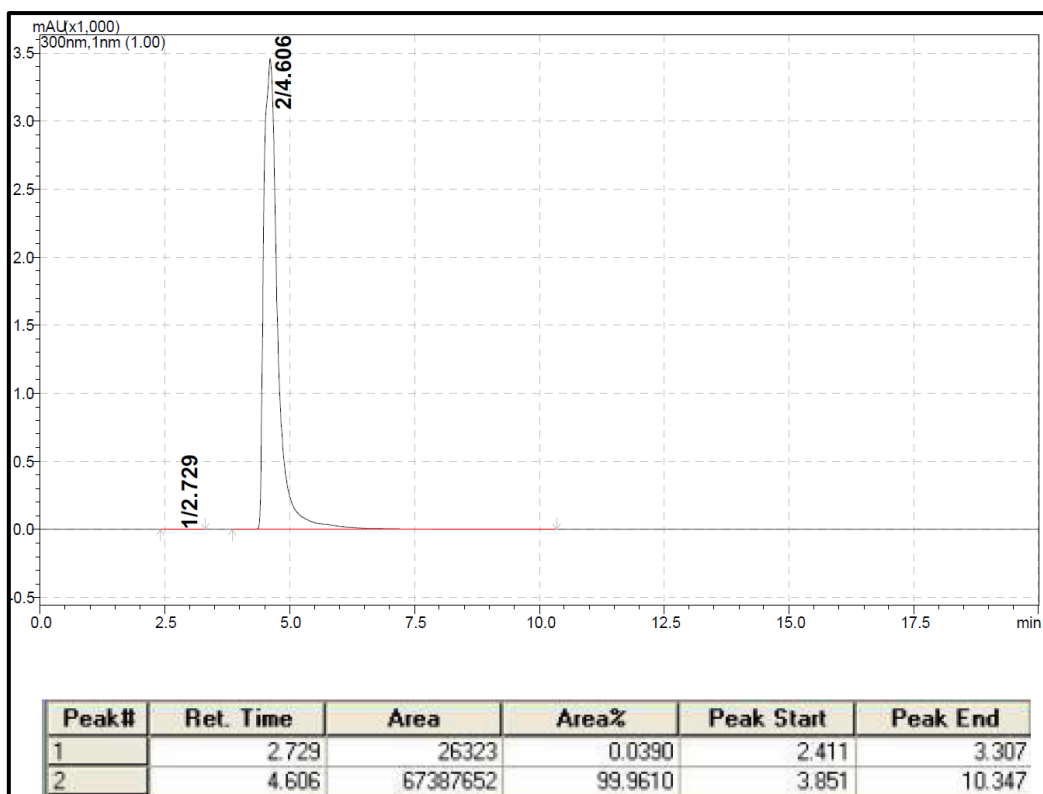

Figure S 53. Chromatogram of (E)-N'-(4-fluorobenzylidene)-1-(4-hydroxy-3-methoxybenzyl)-1H-1,2,3-triazole-4-carbohydrazide (**3k**).

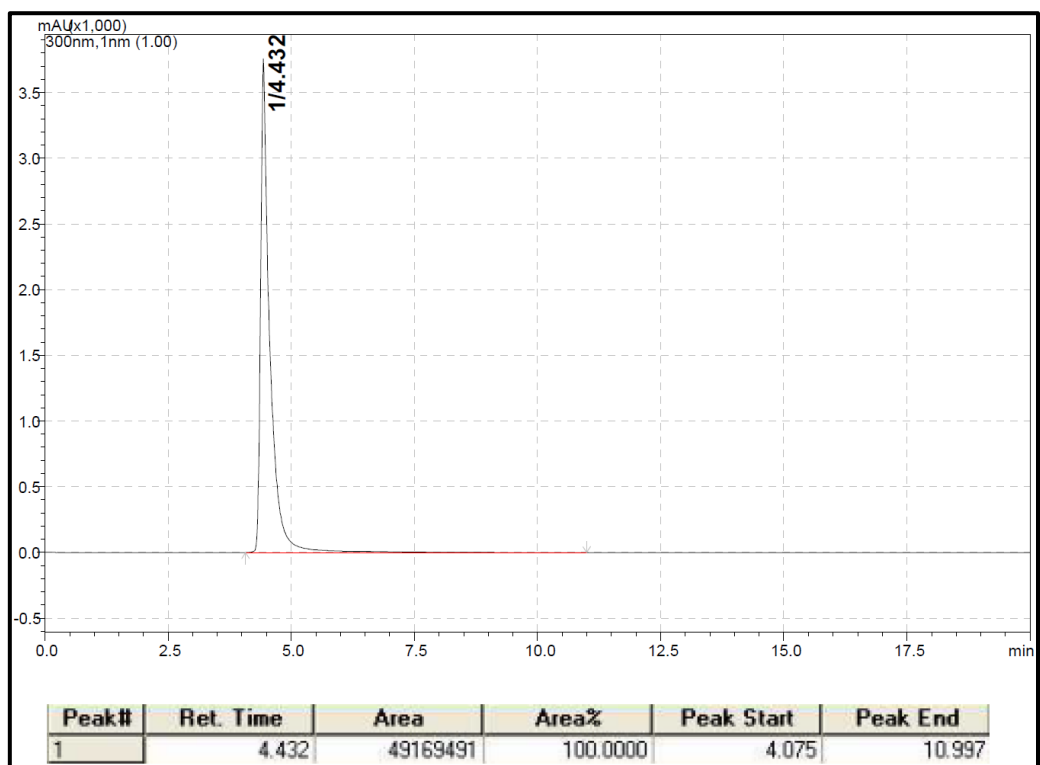

Figure S 54. Chromatogram of (E)-N'-(2-fluorobenzylidene)-1-(4-hydroxy-3-methoxybenzyl)-1H-1,2,3-triazole-4-carbohydrazide (**3l**).



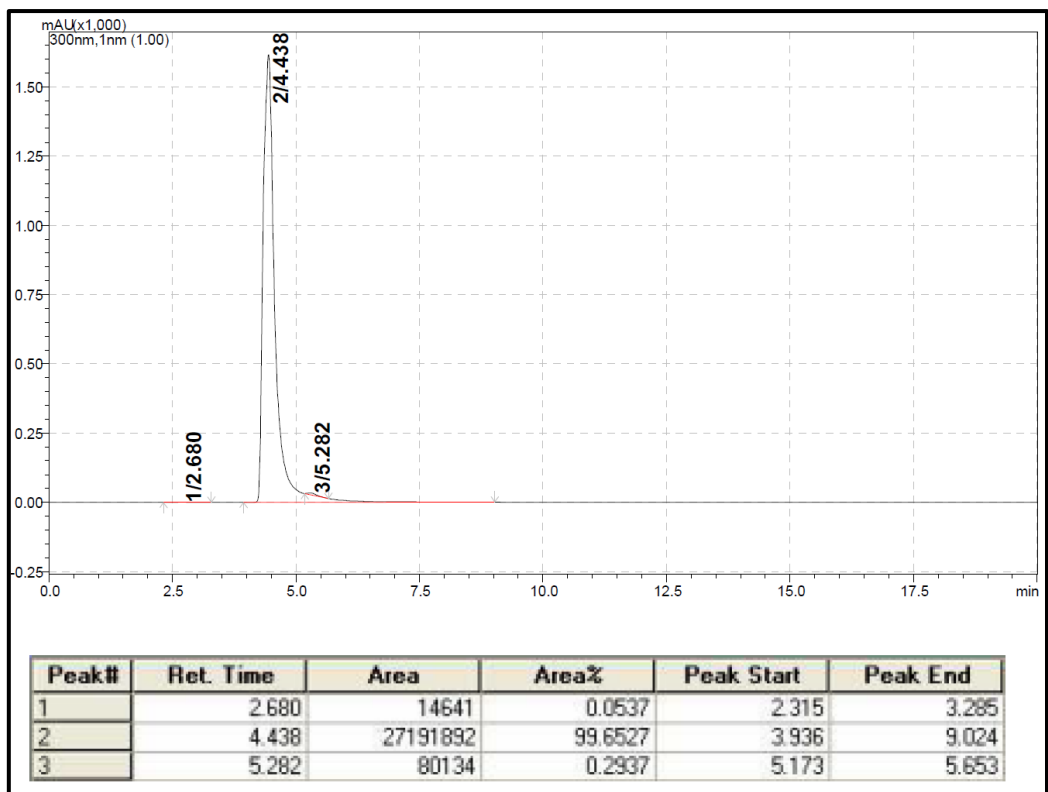

Figure S 55. Chromatogram of (E)-N'-(3-fluorobenzylidene)-1-(4-hydroxy-3-methoxybenzyl)-1H-1,2,3-triazole-4-carbohydrazide (**3m**).
